# Supplementary material
Source: PubMed Central journal article supplement (PMC6139023)
Supplement: NIHMS78940-supplement-Supplemental_Data_File.pdf [file NIHMS78940-supplement-Supplemental_Data_File.pdf]

**Title:** p24 revisited: A landscape review of antigen detection for early HIV diagnosis

**Supplemental Digital Information**

Eleanor R GRAY<sup>1</sup>, Robert BAIN<sup>2</sup>, Olivia VARSANEUX<sup>3</sup>, Rosanna W PEELING<sup>3</sup>, Molly M STEVENS<sup>2</sup>, Rachel A MCKENDRY\*<sup>1,4</sup>

**Supplementary Table 1**

| <b>Study</b>       | <b>Assays used for early detection</b>                                                           | <b>Detection time relative to reference test</b> | <b>Reference test</b>                                |
|--------------------|--------------------------------------------------------------------------------------------------|--------------------------------------------------|------------------------------------------------------|
| Hashida 1996 [1]   | Immune complex transfer EIA (for Ab and Ag)                                                      | Ag - 7-21 days before                            | ELISA, agglutination test (for Ab), and Western blot |
| Sickinger 2004 [2] | Combined-format HIV antigen-antibody (AxSYM HIV Ag/Ab Combo)                                     | 6.15 days before                                 | 3rd generation Ab tests                              |
| Weber 2002 [3]     | Enzyme immunoassay (Cobas Core HIV Combi EIA)                                                    | 3.6 to 5.7 days before                           | 3 <sup>rd</sup> generation Ab tests                  |
|                    |                                                                                                  | 2.75 days after                                  | RT-PCR                                               |
| Weber 2006 [4]     | Fifteen 4 <sup>th</sup> generation assays (VIDAS DUO Ultra to Vironostika HIV uniform II Ag: Ab) | 2.4-6.8 days after                               | PCR                                                  |
|                    | Two 3 <sup>rd</sup> generation assays (Genscreen HIV 1/2, v2 to Ortho HIV-1/HIV-2 Ab capture)    | 6.15-10.25 days after                            | PCR                                                  |

Supplementary Table 1 Summary of the timing of detection of different assays to detect HIV in comparison to reference and p24 assays. Ag – antigen, Ab – antibody.

**Supplementary Table 2**

| Name                                | Manufacturer        | Applicability | Sensitivity (%)                          | Specificity (%) | References        |
|-------------------------------------|---------------------|---------------|------------------------------------------|-----------------|-------------------|
| AxSYM Combo                         | Abbott Laboratories | Laboratory    | 99.6-100                                 | 98.0-100        | [2,5-11]          |
| Architect HIV                       | Abbott Laboratories | Laboratory    | 99.9-100                                 | 99.5-100        | [6-8,12-14]       |
| VIDAS HIV DUO Ultra/Quick           | bioMerieux          | Laboratory    | 95.3-100                                 | 98.1-100        | [3,5,10,11,15,16] |
| LG HIV Ag–Ab ELISA PLUS             | LG                  | Laboratory    | 100                                      | 99.9            | [17]              |
| Elecsys Combi                       | Roche               | Laboratory    | 100                                      | 99.8-99.9       | [7,8,12,18]       |
| Elecsys HIV Combi PT                | Roche               | Laboratory    | 100                                      | 99.8-100        | [6,8,12,18]       |
| Enzygnost HIV Integral              | Siemens             | Laboratory    | 100                                      | 99.2-100        | [3,5,16,19]       |
| GS HIV Combo Ag/Ab EIA              | Siemens             | Laboratory    | 100                                      | 96.7-100        | [9,20,21]         |
| Genscreen Ultra HIV Ag/Ab           | Bio-Rad             | Laboratory    | 99.7-100                                 | 98.1-100        | [3,11,16,22]      |
| Vironostika HIV-1 p24 antigen assay | bioMerieux          | Laboratory    | 91.1-100                                 | 96.7-100        | [11,12,15,16,19]  |
| BioPlex 2200 HIV Ag-Ab assay        | Bio-Rad             | Laboratory    | 100                                      | 99.56           | [23]              |
| Alere Determine HIV-1/2 Ag/Ab       | Alere               | PoC/Lab       | Acute infection (Ag+/Ab-; Ag+/Ab+)       |                 | [24-36]           |
|                                     |                     |               | Ag+: 0-82.1<br>Ab+: 0-66.7               | 0-100           |                   |
|                                     |                     |               | Established infection (Ag+/Ab+; Ag-/Ab+) |                 |                   |
|                                     |                     |               | 88.2-99.8                                | 89.5-100        |                   |

Supplementary Table 2: Commercial assays for p24, with a summary of sensitivity and specificity derived from published studies. Of the assays listed, only the BioPlex 2200 and Alere Determine give separate

readouts for antigen and antibody results. Only studies from independent published trials are included. See Supplementary Table 3 for a breakdown of results from each study (including subsets that included samples from acute infection).

**Supplementary Table 3**

| Reference                | Sample type(s)                                | Index Test                                | Reference method                                                                                         | Sensitivity <sup>§</sup> (%) | Specificity <sup>§</sup> (%) | N (samples)        |
|--------------------------|-----------------------------------------------|-------------------------------------------|----------------------------------------------------------------------------------------------------------|------------------------------|------------------------------|--------------------|
| Chandwani 1993 [37]      | Infants <14 days, plasma, USA                 | HIV Ag ELISA with ICD*1 (Beckman Coulter) | HIV culture, PCR from PBMC, repeated Ab+ve at >15 months, or seroreversion (detection method not stated) | 83                           | 94                           | 23                 |
|                          | Infants 16 days-2 months, plasma, USA         |                                           |                                                                                                          | 60                           | 100                          | 13                 |
|                          | Infants 2-5 months, plasma, USA               |                                           |                                                                                                          | 100                          | 100                          | 9                  |
| Quinn 1993 [38]          | Children <10 yrs, serum, USA                  | HIV-1 p24 ELISA (Coulter) with ICD        | HIV Ab assay (Organon-Teknika) at >15 months of age with symptom assessment                              | 89.5                         | 99.2                         | 404 (158 patients) |
| Bredberg-Rådén 1995 [39] | Infants 1 week-1.5 yrs, PBMC/plasma, Tanzania | HIV Ag ELISA (Coulter) with ICD           | Nested PCR (in-house)                                                                                    | 53.0-70.8 (age stratified)   | 100                          | 69                 |
| Bulterys 1995 [40]       | Infants 6 weeks and 3 months, plasma, Rwanda  | HIV-1 p24 Ag assay with ICD (Abbott)      | Western blot at ≥12 months (Bio-Rad) and symptom assessment                                              | 15.4                         | 100                          | 220 (36 patients)  |
| Lewis 1995 [41]          | Infants <3 months, cord blood or plasma, USA  | Ag ELISA (Coulter) with ICD               | ELISA and Western blot at 15 months                                                                      | 58                           | 85                           | 46                 |
|                          |                                               | NIAID protocol HIV culture                |                                                                                                          | 83                           | 100                          |                    |
|                          |                                               | In-house DNA PCR                          |                                                                                                          | 83                           | 94                           |                    |

|                              |                                                         |                                                                  |                                                                                                                                   |                                                          |                                                               |                          |
|------------------------------|---------------------------------------------------------|------------------------------------------------------------------|-----------------------------------------------------------------------------------------------------------------------------------|----------------------------------------------------------|---------------------------------------------------------------|--------------------------|
| Nielsen<br>1995 [42]         | Infants, <5<br>yrs, plasma,<br>Brazil                   | HIV p24 EIA<br>(Abbott) with<br>ICD                              | ELISA & Western<br>blot > 18 months                                                                                               | With ICD –<br>71.4<br>No ICD –<br>52.4                   | 95                                                            | 40                       |
| Lyamuya<br>1996 [43]         | Infants/adults<br>,<br>plasma/seru<br>m, Tanzania       | Ag ELISA<br>(DuPont)<br>with ICD and<br>ELAST<br>enhancemen<br>t | HIVChek (DuPont),<br>Ab HIV-1 ELISA<br>(Wellcozyme,<br>Murex), Western blot<br>(Diagnostic<br>Biotechnology) or<br>PCR (in-house) | 97.6                                                     | 85.8 1 <sup>st</sup> test,<br>100 overall                     | 507 (453<br>patients)    |
| Nesheim<br>1997 [44]         | Infants 1 wk-<br>1 yr,<br>PBMC/plasm<br>a/serum,<br>USA | HIV p24<br>ELISA<br>(Coulter) with<br>ICD                        | Infected: Ab +ve at<br>≥18 months<br>Uninfected: ≥2x Ab -<br>ve at >6 months<br>PCR on PBMC                                       | 35-93.3 (age<br>stratified)                              | 93-100 (age<br>stratified)                                    | 345                      |
| Panakitsuwan<br>1997<br>[45] | Infants 1<br>day-4 yrs,<br>serum,<br>Thailand           | Ag EIA<br>(Coulter) with<br>ICD                                  | Ab by ELISA &<br>gelatin particle<br>agglutination, RT-<br>PCR                                                                    | With ICD –<br>85.4/87.8<br>No ICD –<br>34.2              | 100                                                           | 71                       |
| Paul 1997<br>[46]            | Infants <4<br>months,<br>plasma/seru<br>m, USA          | HIV-1 p24<br>ELISA<br>(Coulter) with<br>ICD                      | HIV culture and<br>symptom<br>assessment                                                                                          | 59                                                       | 100                                                           | 253<br>(206<br>patients) |
| Rich 1997<br>[47]            | Infants, 0-6<br>months,<br>plasma/seru<br>m, USA        | HIV-1 p24<br>ELISA<br>(Coulter) with<br>ICD                      | HIV culture, ≥ 2<br>positive results                                                                                              | 27 (<7 days)<br>77 (1 month)<br>71-81 (1 to 6<br>months) | 90 (<7 days)<br>100 (1<br>month)<br>98-100 (1 to<br>6 months) | 207<br>patients          |
| Daar 2001<br>[48]            | Adults,<br>primary HIV,<br>plasma, USA                  | HIV p24 Ag<br>EIA, (Abbott)                                      | NAAT (Amplicor,<br>Roche or bDNA,<br>Chiron), Western blot<br>(Cambridge Biotech<br>Corp.), or EIA<br>(Abbott)                    | 88.7                                                     | 100                                                           | 436                      |
| Hecht 2002<br>[49]           |                                                         | HIV p24 Ag<br>EIA (Abbott)                                       | Genscreen HIV Ultra<br>(Bio-Rad), VIDAS                                                                                           | 79                                                       | 99.5                                                          | 258                      |

|                                  |                                                                                                       |                                                |                                                                              |      |      |                                                                                     |
|----------------------------------|-------------------------------------------------------------------------------------------------------|------------------------------------------------|------------------------------------------------------------------------------|------|------|-------------------------------------------------------------------------------------|
|                                  | Adults,<br>primary HIV,<br>plasma, USA                                                                | bDNA<br>(Bayer)                                | Duo Ultra<br>(bioMérieux), VIDAS                                             | 100  | 95.3 |                                                                                     |
|                                  |                                                                                                       | Amplicor<br>PCR,<br>(Roche)                    | Duo Quick<br>(bioMérieux),<br>Architect HIV Combo<br>(Abbott), Elecsys HIV   | 100  | 97.3 |                                                                                     |
|                                  |                                                                                                       | TMA HIV-1<br>RNA,<br>(GenProbe)                | Combi (Roche);<br>Genscreen HIV v2<br>(Bio-Rad), Ortho HIV<br>Capture (Ortho | 100  | 98.4 |                                                                                     |
|                                  |                                                                                                       | Ab-test (Ag<br>Combi EIA,<br>Abbott)           | Diagnostic Systems)                                                          | 77   | 96.8 |                                                                                     |
| Weber<br>2002 [5]                | Adults, blood<br>donor<br>panels,<br>plasma/seru<br>m/culture<br>supernatants<br>, multi-<br>country. | Cobas HIV<br>combi EIA<br>(Roche)              | Various*2                                                                    | 100  | 99.7 | >11,000<br>total across<br>all sites, not<br>all samples<br>tested on<br>all assays |
|                                  |                                                                                                       | VIDAS HIV<br>DUO<br>(bioMérieux)               |                                                                              | 100  | 100  |                                                                                     |
|                                  |                                                                                                       | Enzygnost<br>HIV Integral<br>(Dade<br>Behring) |                                                                              | 100  | 99.7 |                                                                                     |
|                                  |                                                                                                       | Enzymun-<br>Test HIV<br>Combi<br>(Boehringer)  |                                                                              | 100  | 100  |                                                                                     |
|                                  |                                                                                                       | Genscreen<br>HIV1/2,<br>version 2<br>(Bio-Rad) |                                                                              | 98.3 | 100  |                                                                                     |
|                                  |                                                                                                       | IMx HIV-<br>1/HIV-2 III<br>Plus (Abbott)       |                                                                              | 98.7 | ND   |                                                                                     |
| AxSYM HIV-<br>1/2 gO<br>(Abbott) | 100                                                                                                   | ND                                             |                                                                              |      |      |                                                                                     |

|                    |                                            |                                                               |                                                                                                    |                 |             |                                   |
|--------------------|--------------------------------------------|---------------------------------------------------------------|----------------------------------------------------------------------------------------------------|-----------------|-------------|-----------------------------------|
|                    |                                            | Prism Anti-HIV1/2 (Abbott)                                    |                                                                                                    | ND              | 99.9        |                                   |
|                    |                                            | Enzygnost Anti-HIV1/2 plus (Dade Behring)                     |                                                                                                    | 99.8            | 99.9        |                                   |
|                    |                                            | Cobas Core Anti-HIV 1 2 O EIA (Roche)                         |                                                                                                    | 98.3            | ND          |                                   |
| Sutthent 2003 [50] | Infants 1-6 months, plasma/serum, Thailand | Vironostika HIV Ag/Ab (bioMérieux) with ICD and ELAST         | NAAT (Amplicor PCR, Roche)                                                                         | 100             | 100         | 471 (391 patients)                |
| Ly 2004 [11]       | Worldwide subtype panel, supernatant       | 6 combined Ag/Ab tests, and 2 Ab-only tests* <sup>3</sup>     | HIV-1 Ag MAb assay, HIV-1 p24 Ag quantitation assay (both Abbott) or Cobas core HIV Ag EIA (Roche) | 2.5 to >25pg/ml | -           | 31                                |
|                    | Worldwide samples, plasma/serum            |                                                               |                                                                                                    | 99.8-100        | 97.2-100    | 669+ve, 1005 -ve                  |
|                    | Seroconversion panels, plasma              |                                                               |                                                                                                    | 38.1-55.1       | -           | 176 from 25 seroconversion panels |
| Sherman 2004 [51]  | Infants <1yr, plasma, South Africa         | HIV-1 p24 ELISA (Perkin Elmer) with ICD and ELAST enhancement | NAAT (Amplicor PCR, Roche)                                                                         | 98.1            | 98.7        | 203 (90 patients)                 |
| Sickinger 2004 [2] | Adults, Panels,                            | AxSYM HIV Ag/Ab                                               | Western blot (LAV-blot I & II, Bio-Rad),                                                           | 100 (Ab)        | 99.87-99.92 | 9838                              |



|                   |                                              |                                                              |                                                              |                                     |          |                    |
|-------------------|----------------------------------------------|--------------------------------------------------------------|--------------------------------------------------------------|-------------------------------------|----------|--------------------|
|                   | plasma/serum, multicentre                    | Combo (Abbott)                                               | HIV Ag Confirmatory (Murex), NAAT (Monitor, Roche)           | 17.5pg/ml (Ag)                      |          |                    |
| Respass 2005 [52] | Adult, B-subtype, plasma, USA                | HIV-1 p24 ELISA (Coulter) with ELAST enhancement             | Versant bDNA assay (Bayer)                                   | 46.4 (VL<30,000)<br>100 (VL>30,000) | 100      | 451 (284 patients) |
| Nouhin 2006 [53]  | Infants 1-24 months, plasma, Cambodia        | HIV Ag ELISA (Perkin Elmer) with ICD and ELAST amplification | DNA PCR (in-house) and viral cultures                        | 91.3                                | 100      | 169 (147 patients) |
| Patton 2006 [54]  | Infants 1 month-12 yrs, DBS, South Africa    | HIV p24 Ag ELISA (Perkin Elmer)                              | NAAT (DNA PCR Amplicor, Roche, or RNA NucliSens, bioMérieux) | 98.8                                | 100      | 141                |
| Yeom 2006 [17]    | HIV-positive & seroconversion panels, serum. | LG HIV Ag/Ab Plus ELISA (LG Life Sciences)                   | Enzygnost HIV Integral (Dade Behring)                        | 100                                 | 99.9-100 | 1282               |
| Fiscus 2007 [55]  | Infants <180 days, plasma, USA               | HIV p24 Ag ELISA (Perkin Elmer) with ELAST enhancement       | NAAT (Roche Amplicor HIV DNA) and/or HIV culture             | 91.7                                | 98.5     | 802 (582 patients) |
| George 2007 [15]  | Infants IQR: 0.2 to 3.6 yrs, plasma, Haiti   | Vironostika HIV Ag/Ab ELISA (bioMérieux)                     | NAAT (RNA, NucliSENS EasyQ HIV-1, bioMérieux)                | 91                                  | 97       | 401 (233 patients) |
|                   |                                              | Vironostika HIV Ag/Ab                                        |                                                              | 93                                  | 99       |                    |

|                      |                                                      |                                                                             |                                                                               |                                                     |          |      |
|----------------------|------------------------------------------------------|-----------------------------------------------------------------------------|-------------------------------------------------------------------------------|-----------------------------------------------------|----------|------|
|                      |                                                      | ELISA with ELAST enhancement                                                |                                                                               |                                                     |          |      |
|                      |                                                      | VIDAS Duo HIV Ag/Ab (bioMérieux)                                            |                                                                               | 95                                                  | 99       |      |
| Ly 2007 [56]         | See [11]                                             | 11 (6) combined Ag/Ab tests; 2 (2) Ab-only tests (from [11]). <sup>*3</sup> | See [11]                                                                      | 99.4-100                                            | 97.2-100 | 1983 |
| Patton 2008 [57]     | Infants 20 days-6 yrs, DBS, South Africa             | HIV Ag ELISA (Perkin Elmer) with ELAST enhancement                          | NAAT (DNA PCR, Amplicor, Roche, or RNA, NucliSENS EasyQ HIV-1, bioMérieux)    | 88.9-98.3                                           | 100      | 246  |
| Cachafeiro 2009 [58] | Infants, DBS, pan-country                            | HIV Ag ELISA (Perkin Elmer) with ICD and ELAST enhancement                  | NAAT (DNA PCR, Amplicor (Roche) or in-house, or RNA NucliSens QT, bioMerieux) | DBS <20 months old: 94.4 (50-100, age stratified)   | 100      | 502  |
|                      |                                                      |                                                                             |                                                                               | DBS >20 months old: 72.2 (65.6-100, age stratified) |          | 115  |
| Beelaert 2010 [31]   | Panels, plasma/serum/whole blood/culture supernatant | Alere Determine Ab/Ag                                                       | Various*4                                                                     | 86.6                                                | 100      | 379  |
|                      |                                                      | Vironostika HIV Uni-Form II Ag/Ab (bioMérieux)                              |                                                                               | 92.5                                                |          |      |

|                        |                                                            |                                                                                                                                      |                                                                                                                                                                                                    |                                                        |                                                       |                                                                                             |
|------------------------|------------------------------------------------------------|--------------------------------------------------------------------------------------------------------------------------------------|----------------------------------------------------------------------------------------------------------------------------------------------------------------------------------------------------|--------------------------------------------------------|-------------------------------------------------------|---------------------------------------------------------------------------------------------|
| Mwapasa<br>2010 [59]   | Infants 6wks,<br>DBS, Malawi                               | HIV-1 p24<br>ELISA<br>(Perkin<br>Elmer) with<br>ICD                                                                                  | HIV-1 DNA PCR<br>(Roche)                                                                                                                                                                           | 84                                                     | 98                                                    | 222                                                                                         |
| Stewart<br>2010 [60]   | Adults,<br>plasma, USA                                     | NAAT<br>(Cavidi<br>ExaVir), HIV-<br>1 p24 ELISA<br>(Perkin<br>Elmer) with<br>ICD and<br>ELAST<br>enhancemen<br>t +/-<br>modification | NAAT (Amplicor<br>Monitor HIV RNA<br>PCR Roche)                                                                                                                                                    | 75 with<br>modification,<br>66 without<br>modification | 54 with<br>modification<br>44 without<br>modification | 274 (with<br>modificatio<br>n) or 306<br>(without<br>modificatio<br>n)<br>(108<br>patients) |
| Bhowan<br>2011<br>[61] | Adult<br>women,<br>plasma/whol<br>e blood,<br>South Africa | Alere<br>Determine<br>Ag/Ab<br>(Inverness)                                                                                           | RT Advance Quality<br>HIV (Intec), Acon<br>HIV-1/2/O Tri-line<br>(Acon)                                                                                                                            | 100 (plasma<br>and whole<br>blood)                     | 99.8<br>(plasma)<br>99.3 (whole<br>blood)             | 1019<br>(plasma) +<br>380 (whole<br>blood)                                                  |
| Fox 2011<br>[34]       | Stored<br>serum, p24<br>Ag+ve, UK                          | Alere<br>Determine<br>Ab/Ag                                                                                                          | EIA for Ag/Ab<br>(VIDAS Duo,<br>bioMérieux) or EIA<br>(Bio-Rad)                                                                                                                                    | 50.0                                                   | N/A                                                   | 36                                                                                          |
| Kivuyo<br>2011 [62]    | Infants, DBS,<br>Tanzania                                  | HIV-1 p24<br>ELISA<br>(Perkin<br>Elmer)                                                                                              | Amplicor PCR<br>(Roche)                                                                                                                                                                            | 100                                                    | 95.5                                                  | 27                                                                                          |
| Rosenberg<br>2011 [28] | Adult >18<br>yrs, whole<br>blood,<br>plasma,<br>Malawi     | Determine<br>Ab/Ag<br>(Inverness)                                                                                                    | UniGold Recombigen<br>(Trinity Biotech),<br>Bioline HIV 1/2 3.0<br>(Standard<br>Diagnostics), HIV-1<br>p24 ELISA (Perkin<br>Elmer) with ELAST<br>enhancement and<br>Monitor HIV RNA<br>PCR (Roche) | 0.00 (acute)<br>99.4<br>(established)                  | 98.3 (acute)<br>99.2<br>(established)                 | 8 acute,<br>163<br>established<br>,<br>838<br>negative                                      |
|                        |                                                            | HIV-1 p24<br>ELISA<br>(Perkin<br>Elmer) with<br>ELAST<br>enhancemen<br>t                                                             |                                                                                                                                                                                                    | 71.4 (acute)                                           | 100 (acute)                                           |                                                                                             |

|                   |                                                |                                                                 |                                                                                                                               |                                                                                                                               |                                                                                                                                                                                                                                               |      |                    |
|-------------------|------------------------------------------------|-----------------------------------------------------------------|-------------------------------------------------------------------------------------------------------------------------------|-------------------------------------------------------------------------------------------------------------------------------|-----------------------------------------------------------------------------------------------------------------------------------------------------------------------------------------------------------------------------------------------|------|--------------------|
| Spacek 2011 [63]  | Adults, non-B, plasma Uganda                   | HIV p24 ELISA (NEN Life Science) with ICD and ELAST enhancement | NAAT (Amplicor PCR, Roche)                                                                                                    |                                                                                                                               | 69 overall (4x10 <sup>2</sup> -5x10 <sup>4</sup> c/ml – 45, 5x10 <sup>4</sup> -1x10 <sup>5</sup> c/ml – 62, 1x10 <sup>5</sup> -2.5x10 <sup>5</sup> c/ml – 68, 2.5x10 <sup>5</sup> -5x10 <sup>5</sup> c/ml – 80, >5x10 <sup>5</sup> c/ml – 90) | 67   | 394 (331 patients) |
| Chetty 2012 [30]  | Pregnant women, plasma, South Africa           | Determine Ab/Ag (Inverness)                                     | NAAT (PCR, HIV NucliSENSEasyQ v2.0, bioMérieux), Biline HIV 1/2 3.0 (Standard Diagnostics), SENSE Tri-line HIV-1/2/O (Hitech) |                                                                                                                               | Ag – 3.1, Ab – 59.4                                                                                                                                                                                                                           | 96.9 | 32                 |
| Kilembe 2012 [27] | Adults, acute infection, plasma, Rwanda/Zambia | Determine Ab/Ag (Inverness)                                     | Ag EIA (Beckman Coulter), Vironostika HIV Uni-Form II Ag/Ab, (bioMérieux), Capillus and UniGold (Trinity Biotech)             |                                                                                                                               | Ag – 1.9, Ab – 76.7                                                                                                                                                                                                                           | 96.7 | 82                 |
| Patel 2012 [35]   | Adults, acute infection, plasma, USA           | Architect HIV Ag/Ab Combo (Abbott)                              | Genetic Systems HIV 1/2 + O (Bio-Rad) or Oraquick (OraSure ) or OraQuick                                                      | If Ab-ve: NAAT (Aptima HIV-1 RNA Qualitative (Hologic) & Versant HIV-1 RNA 3.0, (Siemens)) , retest with HIV 1/2 + O (Genetic | 87.8                                                                                                                                                                                                                                          | ND   | 33                 |
|                   |                                                | Determine HIV-1 Ag/Ab Rapid Test (Alere)                        | Advance (OraSure )or Vironosti                                                                                                |                                                                                                                               | 75.8                                                                                                                                                                                                                                          |      |                    |
|                   |                                                | Genetic Systems HIV 1/2 + O (Bio-Rad)                           |                                                                                                                               |                                                                                                                               | 57.5                                                                                                                                                                                                                                          |      |                    |

|                   |                                                             |                                             |                                                                                                    |                                                                                                |      |      |  |
|-------------------|-------------------------------------------------------------|---------------------------------------------|----------------------------------------------------------------------------------------------------|------------------------------------------------------------------------------------------------|------|------|--|
|                   |                                                             | Multispot HIV-1/HIV-2 Rapid test (Bio-Rad)  | ka HIV-1 MicroELISA (bioMérieux)                                                                   | Systems) and Multispot HIV-1/HIV-2 (Bio-Rad). If Ab+ve: Western blot (manufacturer not stated) | 33.3 |      |  |
|                   |                                                             | Clearview Complete HIV 1/2 assay (ChemBio)  |                                                                                                    |                                                                                                | 29.6 |      |  |
|                   |                                                             | Unigold Recombigen HIV (Trinity Biotech)    |                                                                                                    |                                                                                                | 24.2 |      |  |
|                   |                                                             | Clearview HIV 1/2 Stat-pak (ChemBio)        |                                                                                                    |                                                                                                | 22.6 |      |  |
|                   |                                                             | OraQuick Advance Rapid HIV-1/2 Ab (OraSure) |                                                                                                    |                                                                                                | 21.9 |      |  |
| Brauer 2013 [33]  | Serum, South Africa                                         | Determine Ab/Ag Combo (Alere)               | Various* <sup>5</sup>                                                                              | Ag – 10<br>Ab - 91                                                                             | 100  | 79   |  |
| Faraoni 2013 [29] | Acutely infected adults, serum, Italy                       | Determine Ab/Ag (Alere)                     | EIA (Architect HIV-1/2 Ag/Ab, Abbott), NAAT (CAP/CTM, Roche), Western blot (New LAV Blot, Bio-Rad) | Ag – 29.4,<br>Ab – 58.8,<br>Ag or Ab – 88.2                                                    | 100  | 17   |  |
| Tao 2013 [12]     | Lysate supernatants (for Ag or p24), seroconversion panels, | Elecsys HIV combi PT (Roche)                | Various* <sup>6</sup>                                                                              | -                                                                                              | 99.9 | 4465 |  |
|                   |                                                             | Elecsys HIV combi (Roche)                   |                                                                                                    | -                                                                                              | 99.9 | 675  |  |

|                     |                                                                |                                                        |                                                                                                                                  |            |       |             |
|---------------------|----------------------------------------------------------------|--------------------------------------------------------|----------------------------------------------------------------------------------------------------------------------------------|------------|-------|-------------|
|                     | NIBSC reference panels, plasma/serum, Korea, China, & Malaysia | Advia Centaur HIV combo (Siemens)                      |                                                                                                                                  | -          | 99.5  | 1039        |
|                     |                                                                | Architect HIV combo (Abbott)                           |                                                                                                                                  | -          | 99.8  | 2751        |
|                     |                                                                | Vironostika HIV Uni-Form II Plus O (Abbott)            |                                                                                                                                  | -          | 100.0 | 703         |
|                     |                                                                | Zhuhai Livzon Anti-HIV EIA (Zhuhai Livzon Diagnostics) |                                                                                                                                  | -          | 100.0 | 675         |
| Mühlbacher 2012 [6] | NIBSC Ag standard (90/636)                                     | Elecsys HIV Combi PT                                   | Not applicable                                                                                                                   | 1.05 IU/mL | -     | 6 dilutions |
|                     |                                                                | Architect HIV Ag/Ab combo (Abbott)                     |                                                                                                                                  | 0.94 IU/mL | -     |             |
|                     |                                                                | Advia Centaur HIV Ag/Ab combo (Siemens)                |                                                                                                                                  | 1.89 IU/mL | -     |             |
|                     |                                                                | AxSYM HIV Ag/Ab (Abbott)                               |                                                                                                                                  | 1.20 IU/mL | -     |             |
|                     | Blood donors                                                   | Elecsys HIV Combi PT                                   | Architect HIV Ag/Ab combo (Abbott), Advia Centaur HIV Ag/Ab combo (Siemens), AxSYM HIV Ag/Ab (Abbott), Prism HIV O Plus (Abbott) | -          | 99.9  | 7343        |
|                     | Routine screening samples                                      |                                                        |                                                                                                                                  | -          | 99.8  | 4103        |
|                     | Cross-reactivity samples                                       |                                                        |                                                                                                                                  | -          | 99.3  | 296         |

|                           |                                |                                           |                                                                                                                                                                            |                                   |      |      |
|---------------------------|--------------------------------|-------------------------------------------|----------------------------------------------------------------------------------------------------------------------------------------------------------------------------|-----------------------------------|------|------|
| Salmona 2014 [23]         | Adults, serum, France          | BioPlex 2200 Ag-Ab (Bio-Rad)              | Architect HIV Ag/Ab Combo (Abbott), ImmunoComb II HIV-1 & 2 BiSpot (Orgenics), New Lav Blot I & II (Bio-Rad)                                                               | 100                               | 99.4 | 1505 |
| Chang 2015 [9]            | Adults, plasma                 | AxSYM HIV 1/2 gO (Abbott)                 | New LAV Blot I (Bio-Rad), Cobas Amplicor HIV-1 Monitor v1.5 (Roche)                                                                                                        | 100                               | 100  | 152  |
|                           |                                | HIV (1+2) Ag/Ab (Beijing Wantai Biopharm) |                                                                                                                                                                            | 98.8                              | 100  |      |
|                           |                                | HIV Combi Ag/Ab EIA (Bio-Rad)             |                                                                                                                                                                            | 100                               | 98.5 |      |
|                           |                                | HIV Ab/Ag (Dia.Pro)                       |                                                                                                                                                                            | 100                               | 100  |      |
| Piwowar-Manning 2015 [21] | >16 years, plasma, whole blood | GS HIV Combo Ag/Ab EIA (Bio-Rad)          | Determine HIV-1/2 (Alere), SD Bioline HIV 1/2 v3 (Standard Diagnostics), UniGold HIV (Trinity Biotech), Architect HIV Ag/Ab (Abbott), Aptima HIV-1 RNA (Hologic Gen-Probe) | Established – 100<br>Acute – 83.3 | 96.7 | 612  |
| Urio 2015 [19]            | Adults, serum, Tanzania        | Enzygnost HIV Integral II Ag/Ab ELISA     | Inno-Lia HIV I/II immunoblot (Innogenetics, Belgium)                                                                                                                       | 100                               | 100  | 600  |
|                           |                                | Murex HIV Ag/Ab                           |                                                                                                                                                                            | 100                               | 100  |      |
|                           |                                | Vironostika HIV Uniform II Ag/Ab          |                                                                                                                                                                            | 100                               | 99.5 |      |

|                    |                                                                 |                                                   |                                                                          |                                                       |       |      |
|--------------------|-----------------------------------------------------------------|---------------------------------------------------|--------------------------------------------------------------------------|-------------------------------------------------------|-------|------|
| Bystryak 2016 [64] | Children, plasma/ serum, USA                                    | ELISA + photochemical signal amplification system | Amplicor HIV-1 Monitor (Roche)                                           | VL<br><3,000c/mL:<br>52.6<br>VL<br>>3,000c/mL:<br>100 | 100   | 182  |
| Kong 2016 [65]     | Blood donor panels (early infection), China                     | xMAP (Luminex, USA)                               | Western Blot (details not specified), NAAT (RNA, details not specified)  | 57.8                                                  | -     | 33   |
| Peters 2016 [14]   | Adults, acute infection, USA                                    | Architect Ag/Ab (Abbott)                          | NAAT (Aptima HIV-1 RNA, Gen-Probe, or m2000 RealTime HIV-1, Abbott)      | 79.8                                                  | 99.9  | 168  |
| Stekler 2016 [66]  | Adults, acute infection, whole blood/ serum/ plasma/ saliva USA | OraQuick Advance HIV-1/2 (OraSure), saliva        | Pooled NAAT (RealTime HIV-1 RNA, Abbott), Architect HIV-1 Ag/Ab (Abbott) | RNA+ve: 75.0<br>Ag+ve: 85.0                           | 99.9  | 2180 |
|                    |                                                                 | OraQuick Advance HIV-1/2 (Orasure), whole blood   |                                                                          | RNA+ve: 77.9<br>Ag+ve: 88.3                           | 100.0 | 2175 |
|                    |                                                                 | Uni-Gold (Trinity Biotech)                        |                                                                          | RNA+ve: 84.9<br>Ag+ve: 95.7                           | 100.0 | 1614 |
|                    |                                                                 | INSTI HIV-1 (bioLytical)                          |                                                                          | RNA+ve: 73.3<br>Ag+ve: 84.6                           | 99.8  | 559  |
|                    |                                                                 | Determine Ag/Ab Combo (Alere)                     |                                                                          | RNA+ve: 84.6<br>Ag+ve: 91.7                           | 99.0  | 1523 |
|                    |                                                                 | GenScreen HIV-1/HIV-2+O Ab EIA (Bio-Rad)          |                                                                          | RNA+ve: 87.9                                          | 99.8  | 2161 |



|                           |                                                                      |                                                               |                                                                                                                                              |                             |      |      |
|---------------------------|----------------------------------------------------------------------|---------------------------------------------------------------|----------------------------------------------------------------------------------------------------------------------------------------------|-----------------------------|------|------|
| Blaich 2017<br>[67]       | Adults, serum,<br>Switzerland                                        | Elecsys HIV<br>Combi PT<br>(Roche)                            | VIDAS Duo EIA<br>(bioMérieux), Inno-Lia<br>HIV I/II (Innogenetics),                                                                          | 100                         | 99.7 | 3997 |
|                           |                                                                      | Architect HIV<br>Ag/Ab<br>Combo<br>(Abbott)                   | NAAT (Cobas<br>AmpliPrep/Cobas<br>TaqMan HIV-1, Roche)                                                                                       | 100                         | 99.8 |      |
| Fitzgerald<br>2017 [68]   | Stored and<br>fresh samples,<br>plasma/ serum/<br>whole blood,<br>UK | HIV-1/2<br>Ag/Ab<br>Combo<br>(Alere)                          | Architect HIV Ag/Ab<br>Combo (Abbott),<br>VIDAS Duo EIA<br>(bioMérieux)                                                                      | p24: 88<br>Ab: 100          | 100  | 120  |
| Ghissetti 2017<br>[69]    | Adults/panels,<br>Italy                                              | Liason XL<br>HIV Ag/Ab<br>(DiaSorin)                          | Architect HIV Ag/Ab<br>Combo (Abbott),<br>Western blot (New LAV<br>Blot, Bio-Rad), NAAT<br>(Cobas<br>AmpliPrep/Cobas<br>TaqMan HIV-1, Roche) | p24:<br>9.9pg/mL<br>Ab: 100 | 99.7 | 3090 |
| Masciotra<br>2017<br>[70] | Adults, stored<br>plasma, USA                                        | Determine<br>HIV-1/2<br>Ag/Ab<br>Combo                        | Architect HIV Ag/Ab<br>Combo (Abbott),<br>MultiSpot HIV-1/HIV-2<br>Rapid (Bio-Rad)                                                           | p24: 50.0<br>Ab: 99.6       | 100  | 508  |
| Meggi 2017<br>[71]        | Infants, whole<br>blood,<br>Mozambique                               | Lynx p24 Ag<br>POC                                            | Cobas<br>AmpliPrep/Cobas<br>TaqMan HIV-1<br>(Roche), Amplicor HIV-<br>1 Monitor (Roche)                                                      | 71.9                        | 99.6 | 879  |
| Stafylis 2017<br>[72]     | Stored serum,<br>USA                                                 | Determine<br>HIV-1/2<br>Combo<br>(Alere)                      | Advia Centaur HIV-<br>1/O/2 (Siemens), HIV-1<br>Western blot, Aptima<br>HIV-1 RNA (Hologic),                                                 | 95                          | 100  | 133  |
|                           |                                                                      | SD Bioline<br>HIV Ag/Ab<br>Combo<br>(Standard<br>Diagnostics) | Architect HIV Ag/Ab<br>Combo (Abbott),<br>Cobas<br>AmpliPrep/Cobas<br>TaqMan HIV-1 (Roche)                                                   | 91                          | 100  | 133  |

|                      |                                         |                                                   |                                                                                                                                         |                                                                              |      |    |
|----------------------|-----------------------------------------|---------------------------------------------------|-----------------------------------------------------------------------------------------------------------------------------------------|------------------------------------------------------------------------------|------|----|
| van Tienen 2017 [73] | Adults, stored serum, Netherlands       | HIV-1/2 Ag/Ab Combo (Alere)                       | Architect HIV Ag/Ab Combo (Abbott), Liason XL HIV Ag/Ab (DiaSorin), VIDAS Duo EIA (bioMérieux), Inno-Lia HIV Ab (Inogenetics)           | Acute (p24): 65<br>Recent (p24): 24<br>Recent (Ab): 100<br>Chronic (Ab): 100 | -    | 89 |
| Fransen 2017 [74]    | Seroconverters (acute), plasma, Belgium | Enzygnost Anti-HIV 1/2 Plus                       | Inno-Lia Score I/II (Innogenetics), neutralization by Innotest HIV Ag mAb (Fujirebio), NAAT (Cobas AmpliPrep/Cobas TaqMan HIV-1, Roche) | 11.4                                                                         | 100  | 77 |
|                      |                                         | Vironostika HIV Ag/Ab (bioMérieux)                |                                                                                                                                         | 34.3                                                                         | 95   |    |
|                      |                                         | Innotest HIV Ag mAb EIA (Fujirebio)               |                                                                                                                                         | 45.7                                                                         | 100  |    |
|                      |                                         | Determine HIV-1/2 (Alere)                         |                                                                                                                                         | 6.1                                                                          | -    |    |
|                      |                                         | Determine HIV-1/2 Ag/Ab (Alere)                   |                                                                                                                                         | 8.6                                                                          | 93.1 |    |
|                      |                                         | SD Bioline HIV-1/2 (Standard Diagnostics)         |                                                                                                                                         | 12.1                                                                         | -    |    |
|                      |                                         | SD Bioline HIV Ag/Ab Combo (Standard Diagnostics) |                                                                                                                                         | 29.4                                                                         | 100  |    |
| Alere HIV Combo      | 17.1                                    | 93.1                                              |                                                                                                                                         |                                                                              |      |    |
| Eshleman 2018 [75]   | Adults, acute infection,                | Architect HIV Ag/Ab                               | Oraquick Advance HIV-1/2 Ab (OraSure),                                                                                                  | 45.8                                                                         | -    | 24 |

|                   |                                          |                                           |                                                                                                                 |      |      |      |
|-------------------|------------------------------------------|-------------------------------------------|-----------------------------------------------------------------------------------------------------------------|------|------|------|
|                   | plasma,<br>USA/South<br>Africa           | Combo<br>(Abbott)                         | UniGold Recombigen<br>(Trinity Biotech),<br>Geenius HIV-1/2 Ab<br>(Bio-Rad), NAAT<br>(Aptima HIV-1,<br>Hologic) |      |      |      |
|                   |                                          | GS HIV<br>Combo<br>Ag/Ab EIA<br>(Bio-Rad) |                                                                                                                 | 50.0 |      |      |
|                   |                                          | BioPlex 2200<br>HIV Ag-Ab<br>(Bio-Rad)    |                                                                                                                 | 45.8 |      |      |
| Zhao 2018<br>[76] | Adults/panels,<br>serum/lysate,<br>China | Lumipulse<br>HIV Ag/Ab<br>(Fujirebio)     | Western blot (HIV blot<br>2.2, MP Diagnostics),<br>NAAT (Cobas<br>AmpliPrep/Cobas<br>TaqMan HIV-1, Roche)       | 100  | 99.2 | 1153 |
|                   |                                          | Elecsys HIV<br>Combi PT                   |                                                                                                                 | 100  | 100  |      |

Supplementary Table 3. Reported sensitivity and specificity of p24 antigen detection from selected studies. Studies were selected that were designed to comprehensively measure one or more index assay characteristics (e.g. sensitivity, specificity, subtype-breadth) against one or more reference methods.

§ Sensitivity and specificity, where given, are for the Ag detection part of the test unless otherwise stated. Names of companies or assay manufacturers, as far as possible, are given as those at the time of print of the original paper. ELAST enhancement; a tyramide signal amplification system that improves sensitivity for standard horseradish peroxidase-based ELISAs

**Abbreviations.** Ag: p24 antigen; Ab: antibody; DBS: dried blood spot; ICD: immune-complex disruption; IQR: inter-quartile range; N/A: not applicable; NAAT: nucleic acid amplification test; PBMC: Peripheral blood mononuclear cells; TMA: transcription-mediated amplification.

\*1 Two modifications were proposed to the manufacturers guidelines for the assay; the best results of the two modifications are presented.

\*2 HIV-1/HIV-2 3rd gen Plus EIA (Genetic Systems), IMx HIV-1/HIV-2 III Plus (Abbott), AxSYM HIV-1/2 gO (Abbott), Prism HIV-O Plus (Abbott), VIDAS HIV DUO (bioMérieux), Genscreen HIV-1/2 (Bio-Rad), Enzygnost Anti-HIV1/2 Plus (Dade Behring), Enzygnost HIV Integral (Dade Behring), Enzygnost Anti- HIV (Dade Behring), Enzymun-Test HIV Combi (Boehringer), and Cobas Core Anti-HIV 1 2 O EIA (Roche Diagnostics).

\*3 AxSYM HIV Ag/Ab Combo (Abbott), Enzygnost HIV Integral (Dade Behring), Genscreen Plus HIV Ag/Ab (Bio-Rad), Murex HIV Ag/Ab Combo (Abbott), VIDAS HIV DUO (bioMérieux) and Vironostika HIV Uniform II Ag/Ab (Organon Teknika).

\*4 Vironostika HIV Uni-Form (Organon Teknika), HIV1/HIV2 ELISA kit (Cambridge Biotech), Vironostika HIV Uniform II plus O (bioMérieux), the Vironostika HIV Uni-Form II Ag/Ab (bioMérieux) and/or the Enzygnost Anti-HIV 1/2 Plus test (Dade Behring). Reactive samples were further characterized with the Inno-Lia HIV Confirmation assay or the Inno-Lia HIV I/II Score test (Innogenetics)

\*5 Cobas HIV Combi kit on Modular E170 (Roche Diagnostics), HIV Ag/Ab Combo kit on AxSYM (Abbott) and HIV Ag/Ab Combo kit on Architect i2000 (Abbott). Two of the HIV-1/2 antibody reactive specimens had confirmatory testing performed on the Determine HIV-1/2 assay (third generation rapid assay) instead of a fourth-generation HIV-

1/2 ELISA. The Cobas HIV Ag kit (Roche) on Modular E170 was used for initial p24 antigen determination on the diagnostic specimens.

\*6 Advia Centaur HIV Ag/Ab combo (Siemens), Architect HIV Ag/Ab combo (Abbott), Vironostika HIV Uni-Form II Plus O (bioMérieux), Elecsys HIV combi (Roche), Zhuhai Livzon Anti-HIV EIA (Zhuhai Livzon Diagnostics), Serodia HIV1/2 Particle Agglutination (Fujirebio).

**Supplementary Table 4**

| Reference               | Method described | Treatment                                                                                                                                                                                                                                                                                                                                                                                                                            |
|-------------------------|------------------|--------------------------------------------------------------------------------------------------------------------------------------------------------------------------------------------------------------------------------------------------------------------------------------------------------------------------------------------------------------------------------------------------------------------------------------|
| Kageyama 1988 [77]      | Heat/Acid        | 200 µl sample mixed with 200 µl glycine-HCl pH 2.0, heated to 70°C for 5/10 min, neutralized with 3 µl 5 M Tris; Tested by Abbott Ag EIA                                                                                                                                                                                                                                                                                             |
| Mathiesen 1988 [78]     | Acid             | 1 M HCl added to 400 µl serum to give pH 3.0 (usually 30 µl), incubated at RT for 90 min, then 4°C, neutralized to pH 7.4 with 1 M NaOH, immediately used for ELISA                                                                                                                                                                                                                                                                  |
| Von Sydow 1988 [79]     | Acid             | 100 µl serum mixed with 25 µl 0.5 M HCl, incubated RT 90 min then neutralized 25 µl 0.5 M NaOH and diluted to 200 µl with PBS. Used in ELISA                                                                                                                                                                                                                                                                                         |
| Nishanian 1990 [80]     |                  | 100 µl serum mixed with 50 µl 0.5 N HCl pH 2.5-3.0, incubated 60 min 37°C, neutralized with 50 µl 0.5 N NaOH to pH 7.0. 22 µl Triton X-100 added, then 200µl used for ELISA                                                                                                                                                                                                                                                          |
| Ascher 1992 [81]        | Acid             | ELISA: 200 µl 1.5 M glycine pH 1.85 added to 200 µl serum, mix, incubate 37°C 60 min, neutralize 1.5 M Tris pH 9.0                                                                                                                                                                                                                                                                                                                   |
| Bollinger 1992 [82]     | Acid             | 100 µl specimen mixed 0.5 N HCl, 50 µl incubated 60 min 37°C, neutralized 50 µl 0.5 N NaOH, then ELISA                                                                                                                                                                                                                                                                                                                               |
| Papaevangelou 1992 [83] | Acid or Heat     | 100 µl plasma or serum mixed with 200 µl glycine-HCl pH 2.0, heated to 70°C 10 min. Neutralized to pH 7.4 with 10-20 µl 5 M Tris<br>OR<br>200 µl plasma or serum titrated with 1 M HCl (usually ~20µl) to pH 3.0, incubated RT for 90 min, then placed on ice and neutralized to pH 7.4 with 1 M NaOH (usually 20 µl)                                                                                                                |
| Chandwani 1993 [37]     | 2x Acid          | 100 µl plasma mixed with 190 µl 0.15 M glycine-HCl pH 2.0. Heated 70°C 10 min, neutralized by 10 µl 5M Tris. 200 µl used for ELISA<br>OR<br>100 µl plasma mixed with 50 µl 0.5N HCl (pH 2-3), incubated 37°C 60min, neutralized 50 µl 0.5 N NaOH on ice                                                                                                                                                                              |
| Fenouillet 1993 [84]    | Acid             | 100 µl serum mixed 100 µl glycine pH 2.5 37°C 90min, then neutralized with 100 µl Tris pH 7.5.                                                                                                                                                                                                                                                                                                                                       |
| Kashala 1993 [85]       | PEG or Acid      | PEG: 450 µl serum incubated with 350 µl 0.2 M EDTA and 200 µl of 12% PEG for 16-20 h at 4°C. Mix spun at 8,000 xg for 15 min at 4°C. S/n frozen at -70°C; pellet washed 6x in 20x vol of cold PBS, then resuspended in 6 M guanidinium HCl<br>Acid: 100 µl serum incubated with 0.5 N HCl pH 3 1 h 37°C, then neutralized with 0.5 N NaOH. Triton X-100 added, and sample assayed<br>Note: Abs released from disruption also assayed |
| Lillo 1993 [86]         | Acid/Heat        | Coulter protocol: 1:1 dilution of serum with 1.5 M glycine-HCl pH 1.8, incubated 90 min 37°C then neutralized with 1.5 M Tris pH 9.0                                                                                                                                                                                                                                                                                                 |

|                          |              |                                                                                                                                                                                                                    |
|--------------------------|--------------|--------------------------------------------------------------------------------------------------------------------------------------------------------------------------------------------------------------------|
| Miles 1993 [87]          | Acid/Heat    | Coulter ICD kit: 70 µl sample added to 70 µl 1.5 M glycine-HCl pH 1.8, 37°C 90 min, then 70 µl 1.5 M Tris-HCl pH 7.4, incubate 2 h. 200 µl used for ELISA                                                          |
| Pokriefka 1993 [88]      | Heat/Acid    | After [80]. 200 µl serum mixed with 100 µl 0.5 N HCl then 37°C 60 min. Adjusted to pH 7 with 0.5 N NaOH, assayed by ELISA                                                                                          |
| Quinn 1993 [38]          | Acid         | Not described, but [80] and [82] referenced                                                                                                                                                                        |
| Schüpbach 1993 [89]      | Heat         | Serum or plasma diluted 1:3 with distilled H <sub>2</sub> O or 0.5% Triton X-100, 'boiled in dry heat block' (100°C for 2, 3 or 5 min)                                                                             |
| Simon 1993 [90]          | Acid         | Coulter ICD-prep kit. 10 µl lysis reagent, 100 µl sample and 100 µl 1.5 M glycine-HCl pH 1.85 mixed, incubated 37°C for 90 min then 100 µl 1.5 M Tris pH 9 added                                                   |
| Vasudevachari 1993 [91]  | Acid or Heat | 100 µl serum added to 1.5 M glycine pH 1.8-2.2, incubated 37°C 1 h, then neutralized with 100 µl 1.5 M Tris pH 8.6-9.0<br>OR<br>100 µl serum incubated 1 h 50 µl 0.5 N HCl, then neutralized with 50 µl 0.5 N NaOH |
| Duiculescu 1994 [92]     | Acid         | 100 µl plasma mixed 100 µl 1.5 M glycine-HCl pH 1.85, incubated 37°C for 90 min, then neutralized with 100 µl 1.5 M Tris-HCl; 200 µl used for ELISA                                                                |
| Morand-Joubert 1994 [93] | Acid         | 100 µl serum added to 190 µl 0.15 M glycine-HCl pH 2, incubated at 70°C for 10 min, neutralized with 10 µl 3.5 M Tris                                                                                              |
| Schüpbach 1994 [94]      | Heat         | Samples diluted with 2 volumes of 0.5% Triton X-100, boiled for 5min                                                                                                                                               |
| Brown 1995 [95]          | Acid         | ICD-Prep kit, Coulter Immunology                                                                                                                                                                                   |
| Bulterys 1995 [40]       | Acid         | 100 µl plasma incubated 100 µl glycine and 30 µl lysis buffer, 90 min, 37°C then neutralized with 100 µl Tris. 200 µl then used for ELISA                                                                          |
| Gutierrez 1995 [96]      | Acid         | Coulter ICD; 300 µl serum, 150 µl 1.5 M glycine-HCl, incubated 37°C for 60 min, neutralized with 1.5 M Tris. 200 µl used for ELISA                                                                                 |
| Kappes 1995 [97]         | Acid         | Coulter assay, details not given, but see [98]                                                                                                                                                                     |
| Lewis 1995 [41]          | Acid/Heat    | Coulter ICD-prep kit: 100 µl plasma added to 100 µl 0.15 M glycine-HCl with Triton X-100, incubated 90 min 37°C, neutralized with Tris. 200 µl used for ELISA                                                      |
| Nielsen 1995 [42]        | Acid/Heat    | 100 µl plasma added to 190 µl glycine-HCl, then 10 min at 70°C, then 10 µl Tris base. 200 µl used for ELISA                                                                                                        |
| Guay 1996 [99]           | Acid         | Coulter ICD kit; 100 µl sample incubated with lysis buffer and glycine for 90 min, neutralized with Tris, then 200 µl used for ELISA                                                                               |
| Lyamuya 1996 [43]        | Heat         | Samples diluted (1:3, 1:6 or a few 1:12/1:24) with 0.5% Triton X-100, boiled for 5 min at 100°C. 250 µl used for ELISA                                                                                             |
| Stanojevic 1996 [100]    | Acid         | 100 µl serum incubated with 50 µl 0.5 M HCl for 60 min 37°C, then 50 µl 0.5 M NaOH. Analysed by ELISA                                                                                                              |
| Boni 1997 [101]          | Heat         | 100 µl plasma diluted 500 µl 0.5% Triton X-100, 5 min at 100°C, then ELISA                                                                                                                                         |

|                               |                                        |                                                                                                                                                                                                                                                                                                              |
|-------------------------------|----------------------------------------|--------------------------------------------------------------------------------------------------------------------------------------------------------------------------------------------------------------------------------------------------------------------------------------------------------------|
| Nesheim 1997 [44]             | Acid                                   | 70 µl plasma added to 70 µl 1 M glycine buffer pH 1.85, 21 µl 5% Triton X-100. Incubated 37°C 1 h, then 70 µl 1M Tris pH 9.0. 200 µl used for ELISA (Coulter)                                                                                                                                                |
| Panakitsuwan 1997 [45]        | Acid or Heat                           | Acid – Coulter ICD-Prep kit<br>Heat – following method of [94]                                                                                                                                                                                                                                               |
| Paul 1997 [46]                | Acid                                   | Samples added to 22.5 µl lysis buffer, then 75 µl glycine, then incubated 37°C 90 min. Then 75 µl Tris, and 200 µl each mixture added to ELISA reaction plate                                                                                                                                                |
| Rich 1997 [47]                | Acid                                   | Coulter ICD_PreP kit, according to manufacturer's instructions                                                                                                                                                                                                                                               |
| Fackler 1998 [102]            | Acid                                   | Not described: Coulter ELISA                                                                                                                                                                                                                                                                                 |
| Steindl 1998 [103]            | Comparison of methods on model samples | Heat - Plasma diluted 1/3 with 7mM SDS/1.5mM DTPA pH 7.2, incubated 95-98°C 4min<br>Heat – Plasma diluted 1/3 with distilled H <sub>2</sub> O, incubated 100°C 5min<br>Acid – Plasma diluted 1/3 with 1.5 M glycine-HCl pH 1.85, incubated 37°C 1 h, then neutralized 100 µl 1.5 M Tris-HCl pH 9.0 to 200 µl |
| Nadal 1999 [104]              | Heat                                   | 100 µl plasma diluted with 500 µl 0.5% Triton X-100, heated 100°C 5 min, tested by ELISA                                                                                                                                                                                                                     |
| Ortigão-de-Sampaio 1999 [105] | Acid                                   | Glycine-HCl (no further details)                                                                                                                                                                                                                                                                             |
| Ledergerber 2000 [106]        | Heat                                   | 100 µl plasma diluted with 500 µl 0.5% Triton X-100, 5 min 100°C.                                                                                                                                                                                                                                            |
| Read 2000 [107]               | Acid                                   | Detail not given, but see [98]                                                                                                                                                                                                                                                                               |
| Sutthent 2003 [50]            | Heat                                   | Plasma diluted 1:6 with 0.5% Triton X-100, heated 100°C for 5 min                                                                                                                                                                                                                                            |
| Prado 2004 [108]              | Heat                                   | Plasma diluted 1:6 in 0.5% Triton X-100, heated 100°C 5 min. 250 µl used for ELISA                                                                                                                                                                                                                           |
| Parpia 2010 [109]             | Heat                                   | 25 µl plasma mixed with 75 µl (0.67%NP-40 0.2% SDS in PBS), heated 4 min 88°C, then cooled and assayed by dipstick                                                                                                                                                                                           |

Supplementary Table 4. Methods explored to disrupt immune complexes of host antibody and p24 in blood, prior to diagnostic analysis. A brief summary of the method, where described, is given.

**Supplementary Table 5**

| <b>Assay</b>                                                      | <b>Limit of Detection</b>         | <b>Development stage</b>                              | <b>References</b> |
|-------------------------------------------------------------------|-----------------------------------|-------------------------------------------------------|-------------------|
| Immune complex transfer enzyme immunoassay                        | 26 fg/mL                          | No known further development                          | [110-112]         |
| Immuno-PCR                                                        | <1 virion* or<br>0.2 fg/mL        | No known further development                          | [113,114]         |
| Radioimmunoassay                                                  | 50 fg/mL                          | No known further development                          | [115]             |
| Magnetic immunochromatography                                     | 17-33pg/mL                        | No known further development                          | [116]             |
| Lateral flow with fluorescence                                    | <1 pg/mL                          | No known further development                          | [117]             |
| Lateral flow dipstick                                             | 50 pg/mL                          | Under commercialisation                               | [109]             |
| Europium nanoparticle-based immunoassay, microchip and biobarcode | 0.5 pg/mL<br>0.1 pg/mL<br>5 pg/mL | Ongoing, at research stage                            | [118-121]         |
| Amperometric immunosensor                                         | 50 pg/mL<br>8 pg/mL<br>0.5pg/mL   | No known further development                          | [122-124]         |
| Capacitive immunosensor.                                          | 0.25 fg/mL                        | Ongoing, at research stage                            | [125,126]         |
| Amperometric immunosensor                                         | 6.4 pg/mL                         | No known further development                          | [127]             |
| Immunoliposome PCR                                                | 0.24 fg/mL                        | Ongoing, at research stage.<br>Patent WO2005067583 A2 | [128]             |
| Plasmonic ELISA                                                   | 1 ag/mL                           | Ongoing, at research stage                            | [129,130]         |
| Digital immunoassay                                               | 4.9 fg/mL<br>2.5 pg/mL            | Commercially available<br>(Quanterix Corp.)           | [131-133]         |
| Electrochemiluminescence sandwich immunosensor                    | 1 pg/mL                           | TBD                                                   | [134]             |
| Fluorescent protein array                                         | 54 pg/mL                          | No further development                                | [135]             |
| Rapid immunofiltration assay                                      | 420 pg/mL                         | Under commercialisation                               | [136]             |
| Nanoribbon field-effect transistor biosensors                     | 20 fg/mL                          | TBD                                                   | [137]             |
| Thio-NAD cycling amplified ELISA                                  | 25ag/mL                           | TBD                                                   | [138]             |



|                                                                 |                                     |                                              |          |
|-----------------------------------------------------------------|-------------------------------------|----------------------------------------------|----------|
| Photochemical signal amplification system for ELISA             | 80 fg/mL                            | Under commercialization, Patent US8916341 B1 | [64,139] |
| Carbon-dot microfluidic immunoassay                             | 20pg/mL                             | TBD                                          | [140]    |
| Carbon-dot paper ELISA                                          | 250pg/mL                            | TBD                                          | [141]    |
| Zinc nanowire origami biosensor                                 | 300fg/mL                            | TBD                                          | [142]    |
| Colloidal Gold Immunochromatographic Assay                      | 25pg/mL                             | TBD                                          | [143]    |
| Cytometry bead assay                                            | 3.7-30,000pg/mL (subtype dependent) | TBD                                          | [144]    |
| Birefringence ELISA                                             | 250pg/mL                            | TBD. Patent WO2015185504A1                   | [145]    |
| Magnetic bead ELISA                                             | 0.5pg/mL                            | TBD                                          | [146]    |
| Cantilever with optoplasmonic transduction                      | 0.01-0.5fg/mL                       | TBD                                          | [147]    |
| Platinum nanocatalyst lateral flow                              | 0.8pg/mL                            | TBD                                          | [148]    |
| Carbon nanotube/ imprinted polymer-based electrochemical sensor | 83fg/mL                             | TBD                                          | [149]    |
| ELISA with peroxide strip readout                               | 11.6pg/mL                           | TBD                                          | [150]    |
| Dendrimer nanochain lateral flow                                | 5ng/mL                              | TBD                                          | [151]    |
| Surface acoustic wave biosensor                                 | 48ng/mL                             | TBD                                          | [152]    |

Supplementary Table 5: Selected ultrasensitive assays for p24 antigen. fg, femtogram; ag, attogram. Sensitivities or limits of detection given are those calculated by study authors and have not been verified independently. Studies also used a variety of samples including biological buffers or healthy volunteer samples spiked with recombinant p24, or actual patient samples. \*Sample volume not reported, TBD, to be determined (for papers from 2014 onwards). Corresponding authors for all papers prior to 2016 were emailed in January 2017 requesting a status update for the studies listed. In the case of invalid email addresses, contact with another author was attempted.

**Supplementary Table 6**

| Biomarker  | Observed relationship with p24 | References           | Summary of findings and study notes                                                                                                                                                                                                                                                                                                                                                                |
|------------|--------------------------------|----------------------|----------------------------------------------------------------------------------------------------------------------------------------------------------------------------------------------------------------------------------------------------------------------------------------------------------------------------------------------------------------------------------------------------|
| Viral load | Yes                            | Read 2000 [107]      | ICD p24 levels correlated with other biomarker levels (anti-p24 antibody, CD4% and RNA).                                                                                                                                                                                                                                                                                                           |
|            |                                | Pascual 2002 [153]   | HIV RNA and heat dissociated p24 assay were significantly correlated ( $R^2=0.6$ , $p<0.0001$ ). The modified p24 assay with heat dissociation step was more sensitive than the unmodified assay.                                                                                                                                                                                                  |
|            |                                | Fiebig 2003 [154]    | Concurrent increase of HIV-1 RNA and p24 antigen during acute stage of the disease (pre-seroconversion). Slopes (from linear regression of log transformed data) were strongly correlated ( $R^2 = 0.82$ ).                                                                                                                                                                                        |
|            |                                | Ribas 2003 [155]     | Correlation with RNA (Spearman $\rho$ -test, $R = 0.751$ , $p<0.0001$ ). p24 assay detected a wider range of subtypes than the viral load assay. p24 outside viral particles has a half-life of 42 days, hence stays temporarily detectable even after viral loads decrease.                                                                                                                       |
|            |                                | Prado 2004 [108]     | Anti-p24 antibody levels have key influence on detection of p24. A significant correlation between HIV RNA and p24 antigen assays was found ( $p<0.001$ , $\beta = 0.23$ ; logistic regression), but this was weaker and a more gradual slope for those on a structured treatment interruptions program. p24 assays are not sensitive enough for monitoring in some patients with high CD4 counts. |
|            |                                | Stevens 2005 [156]   | Subtype C samples. Moderate correlation between $\log_{10}$ RNA viral load. Major concern is variability and lack of sensitivity.                                                                                                                                                                                                                                                                  |
|            |                                | Brinkhof 2006 [157]  | Evaluated p24 for treatment monitoring in children, and in relation to CD4 levels. Correlation between p24 and RNA ( $p<0.0001$ ). Statistical support for changes in p24 and RNA with respect to CD4 levels. Study of children.                                                                                                                                                                   |
|            |                                | Erikstrup 2008 [158] | p24 correlated with RNA level ( $p<0.0001$ , $R^2 = 0.44$ ).                                                                                                                                                                                                                                                                                                                                       |
|            | No                             | Coombs 1989 [159]    | p24 not as good as plasma viraemia culture counts. No correlation between RNA and p24 or antibody and p24. No immune complex disruption step.                                                                                                                                                                                                                                                      |

|                     |         |                          |                                                                                                                                                                                                                              |
|---------------------|---------|--------------------------|------------------------------------------------------------------------------------------------------------------------------------------------------------------------------------------------------------------------------|
|                     | Unclear | Brown 1995 [160]         | Antibody level is important and discordant results occur:<br>(i) p24 can be higher than RNA due to circulating non-virion associated p24 and (ii) antibodies may mask p24.                                                   |
|                     |         | Respass 2005 [52]        | Correlation with RNA level, though not for viral loads of <5,000c/ml. p24 detection is suitable for paediatric diagnoses, where viral loads are high.                                                                        |
| Disease Progression | Yes     | Spector 1989 [161]       | Used p24 antigen as a virological marker during a trial of zidovudine and ribavirin treatment. Decline in antigenaemia can be used as a biomarker in trials of drugs.                                                        |
|                     |         | MacDonnell 1990 [162]    | Detectable p24 antigenaemia was strongly associated with more rapid progression to AIDS, regardless of initial CD4 cell count.                                                                                               |
|                     |         | Katzenstein 1992 [163]   | Plasma p24 level correlated with 2-tier stage of disease ( $p < 0.001$ for disease stage)                                                                                                                                    |
|                     |         | Morand-Joubert 1994 [93] | p24 is an earlier marker of disease progression when used with an immune complex disruption step.                                                                                                                            |
|                     |         | Bulterys 1995 [40]       | Detection of high levels of p24 strongly linked to rapid progression to AIDS and earlier death in babies. Children with lower p24 (<50pg/mL) survived longer (20 months vs 7 months, $p = 0.02$ ).                           |
|                     |         | Farzadegan 1996 [164]    | Rapid disease progression was more common in people with detectable p24.                                                                                                                                                     |
|                     |         | Ledergerber 2000 [106]   | Mean p24 increased gradually from early to late stage of the disease. p24 protein level was a significant prognostic factor of survival: RNA ( $p < 0.005$ ) and p24 ( $p = 0.043$ ) both predictors of progression to AIDS. |
|                     |         | Read 2000 [107]          | ICD p24 antigen levels were correlated with disease progression better than, or equivalent to, HIV RNA levels or CD4 percent.                                                                                                |
|                     |         | Sterling 2002 [165]      | p24 predicted disease progression in early stage HIV especially when combined with information on CD4+ lymphocyte count and HIV viral load. p24 tests (even quantitative tests) were cheaper than viral load or CD4 counts.  |

|           |         |                        |                                                                                                                                                                                                                                                                                                                                       |
|-----------|---------|------------------------|---------------------------------------------------------------------------------------------------------------------------------------------------------------------------------------------------------------------------------------------------------------------------------------------------------------------------------------|
|           |         | Erikstrup 2008 [158]   | p24 was a better predictor of Center for Disease Control category than CD4 count ( $p < 0.001$ ) but a worse predictor of mortality than HIV-RNA and CD4 count.                                                                                                                                                                       |
|           | Unclear | Baillou 1987 [166]     | Variation seen in correlation of p24 antigenaemia with progression to AIDS in different populations. In Europeans, persistent detectable antigen associated with transition to AIDS. In Central Africans, detectable antigen was not found in patients with AIDS.                                                                     |
|           |         | Duiculescu 1994 [92]   | p24 level decreased during zidovudine treatment. Rapid progression of disease associated with unchanged levels of p24 after treatment. Better information obtained by considering the results from p24 with and without ICD.                                                                                                          |
|           |         | Schüpbach 2005 [167]   | Studied p24 dynamics during structured treatment interruptions. p24 responded less rapidly to breaks in HAART than viral load. p24 increases, but not viral load during the first 8 weeks, was inversely correlated to changes in CD4 levels. p24 levels did not always reduce during treatment that successfully reduced viral load. |
| CD4 Count | Yes     | Katzenstein 1992 [163] | Plasma p24 level correlated with CD4 count ( $p < 0.05$ for CD4 cell count).                                                                                                                                                                                                                                                          |
|           |         | Duiculescu 1994 [92]   | Lower CD4 percent found in those who test positive for p24 antigen levels compared to those who test negative. Study of children.                                                                                                                                                                                                     |
|           |         | Ledergerber 2000 [106] | p24 was found to be a better or equivalent predictor of CD4 depletion than RNA.                                                                                                                                                                                                                                                       |
|           |         | Read 2000 [107]        | ICD p24 levels correlated with other biomarker levels (anti-p24 antibody, CD4% and RNA).                                                                                                                                                                                                                                              |
|           |         | Schüpbach 2005 [167]   | Studied p24 dynamics during structured treatment interruptions. p24 responded less rapidly to breaks in HAART than viral load. p24 increases, but not viral load during the first 8 weeks, was inversely correlated to changes in CD4 levels. p24 levels did not always reduce during treatment that successfully reduced viral load. |
|           |         | Stevens 2005 [156]     | Subtype C samples. Highly significant (inverse) correlation between CD4 and p24 level ( $p < 0.0001$ ). Major concern is variability and lack of sensitivity.                                                                                                                                                                         |

|                   |     |                      |                                                                                                                                                                              |
|-------------------|-----|----------------------|------------------------------------------------------------------------------------------------------------------------------------------------------------------------------|
|                   |     | Brinkhof 2006 [157]  | Evaluated p24 for treatment monitoring in children, and in relation to CD4 levels. Statistical support for changes in p24 and with respect to CD4 levels. Study of children. |
| Anti-p24 Antibody | Yes | Duiculescu 1994 [92] | Anti-p24 antibody level was inversely correlated with p24 antigen.                                                                                                           |
|                   |     | Read 2000 [107]      | ICD p24 levels correlated with other biomarker levels (anti-p24 antibody, CD4% and RNA).                                                                                     |

Supplementary Table 6. Summary of studies investigating the relationship between quantitative p24 levels, other biomarkers, and disease progression.

# References

- 1 Hashida S, Hashinaka K, Nishikata I, Saito A, Takamizawa A, Shinagawa H, *et al.* Earlier diagnosis of HIV-1 infection by simultaneous detection of p24 antigen and antibody IgGs to p17 and reverse transcriptase in serum with enzyme immunoassay. *J Clin Lab Anal* 1996; **10**:213–219.
- 2 Sickinger E, Stieler M, Kaufman B, Kapprell HP, West D, Sandridge A, *et al.* Multicenter Evaluation of a New, Automated Enzyme-Linked Immunoassay for Detection of Human Immunodeficiency Virus-Specific Antibodies and Antigen. *Journal of Clinical Microbiology* 2004; **42**:21–29.
- 3 Weber B, Berger A, Rabenau H, Doerr HW. Evaluation of a New Combined Antigen and Antibody Human Immunodeficiency Virus Screening Assay, VIDAS HIV DUO Ultra. *Journal of Clinical Microbiology* 2002; **40**:1420–1426.
- 4 Weber B, Orazi B, Raineri A, Thorstensson R, Burgisser P, Muhlbacher A, *et al.* Multicenter evaluation of a new 4th generation HIV screening assay Elecsys HIV combi. *Clin Lab* 2006; **52**:463–473.
- 5 Weber B, Gurtler L, Thorstensson R, Michl U, Muhlbacher A, Burgisser P, *et al.* Multicenter Evaluation of a New Automated Fourth-Generation Human Immunodeficiency Virus Screening Assay with a Sensitive Antigen Detection Module and High Specificity. *Journal of Clinical Microbiology* 2002; **40**:1938–1946.
- 6 Muhlbacher A, Schennach H, van Helden J, Hebell T, Pantaleo G, Burgisser P, *et al.* Performance evaluation of a new fourth-generation HIV combination antigen–antibody assay. *Med Microbiol Immunol* 2012; **202**:77–86.
- 7 Kwon J-A, Yoon S-Y, Lee C-K, Lim CS, Lee KN, Sung HJ, *et al.* Performance evaluation of three automated human immunodeficiency virus antigen–antibody combination immunoassays. *Journal of virological methods* 2006; **133**:20–26.
- 8 Song EY, Hur M, Roh EY, Park MH, Moon H-W, Yun YM. Performances of four fourth-generation human immunodeficiency virus-1 screening assays. *Journal of medical virology* 2012; **84**:1884–1888.
- 9 Chang C-K, Kao C-F, Lin P-H, Huang H-L, Ho S-Y, Wong K-C, *et al.* Evaluation of performance of human immunodeficiency virus antigen/antibody combination assays in Taiwan. *Journal of Microbiology, Immunology and Infection* 2015; :1–8.
- 10 Bourlet T, Pretis C, Pillet S, Lesenechal M, Piche J, Pozzetto B. Comparative evaluation of the VIDAS HIV DUO Ultra assay for combined detection of HIV-1 antigen and antibodies to HIV. *Journal of virological methods* 2005; **127**:165–167.
- 11 Ly TD, Laperche S, Brennan C, Vallari A, Ebel A, Hunt J, *et al.* Evaluation of the sensitivity and specificity of six HIV combined p24 antigen and antibody assays. *Journal of virological methods* 2004; **122**:185–194.
- 12 Tao CM, Cho Y, Ng KP, Han X, Oh E-J, Zainah S, *et al.* Validation of the Elecsys® HIV combi PT assay for screening and reliable early detection of HIV-1 infection in Asia. *Journal of Clinical Virology* 2013; **58**:221–226.
- 13 Chavez P, Wesolowski L, Patel P, Delaney K, Owen SM. Evaluation of the performance of the Abbott ARCHITECT HIV Ag/Ab Combo Assay. *Journal of Clinical Virology* 2011; **52**:S51–S55.

- 14 Peters PJ, Westheimer E, Cohen S, Hightow-Weidman LB, Moss N, Tsoi B, *et al.* Screening Yield of HIV Antigen/Antibody Combination and Pooled HIV RNA Testing for Acute HIV Infection in a High-Prevalence Population. *JAMA* 2016; **315**:682–690.
- 15 George E, Beauharnais CA, Brignoli E, Noel F, Bois G, De Matteis Rouzier P, *et al.* Potential of a simplified p24 assay for early diagnosis of infant human immunodeficiency virus type 1 infection in Haiti. *Journal of Clinical Microbiology* 2007; **45**:3416–3418.
- 16 Cooray S, Perry KR, Dean L, Delieu E. *Evaluation Report*. 2003.
- 17 Yeom J-S, Jun G, Chang Y, Sohn M-J, Yoo S, Kim E, *et al.* Evaluation of a new fourth generation enzyme-linked immunosorbent assay, the LG HIV Ag–Ab Plus, with a combined HIV p24 antigen and anti-HIV-1/2/O screening test. *Journal of virological methods* 2006; **137**:292–297.
- 18 Wang T, Li D, Yan K, Yuan Y, Yang T, Du X, *et al.* Performance evaluation of a new fourth-generation HIV Ag/Ab combination electrochemiluminescence immunoassay – evaluation of a new HIV assay. *Int J STD AIDS* 2013; **25**:267–272.
- 19 Urio LJ, Mohamed MA, Mghamba J, Abade A, Aboud S. Evaluation of HIV antigen/antibody combination ELISAs for diagnosis of HIV infection in Dar Es Salaam, Tanzania. *Pan Afr Med J* 2015; **20**:196.
- 20 Mitchell EO, Stewart G, Bajzik O, Ferret M, Bentsen C, Shriver MK. Performance comparison of the 4th generation Bio-Rad Laboratories GS HIV Combo Ag/Ab EIA on the EVOLIS™ automated system versus Abbott ARCHITECT HIV Ag/Ab Combo, Ortho Anti-HIV 1+2 EIA on Vitros ECi and Siemens HIV-1/O/2 enhanced on Advia Centaur. *Journal of Clinical Virology* 2013; **58**:e79–e84.
- 21 Piwowar-Manning E, Fogel JM, Richardson P, Wolf S, Clarke W, Marzinke MA, *et al.* Performance of the fourth-generation Bio-Rad GS HIV Combo Ag/Ab enzyme immunoassay for diagnosis of HIV infection in Southern Africa. *Journal of Clinical Virology* 2015; **62**:75–79.
- 22 Shima T, Kondo M, Saito T, Kawata K, Ito A, Sakamoto M, *et al.* [Evaluation of an HIV screening assay kit for the combined detection of anti-HIV-1/2 antibodies and HIV p24 antigen]. *Kansenshogaku Zasshi* 2001; **75**:1014–1024.
- 23 Salmona M, Delarue S, Delaugerre C, Simon F, Maylin S. Clinical evaluation of BioPlex 2200 HIV Ag-Ab, an automated screening method providing discrete detection of HIV-1 p24 antigen, HIV-1 antibody, and HIV-2 antibody. *Journal of Clinical Microbiology* 2014; **52**:103–107.
- 24 Conway DP, Holt M, McNulty A, Couldwell DL, Smith DE, Davies SC, *et al.* Multi-Centre Evaluation of the Determine HIV Combo Assay when Used for Point of Care Testing in a High Risk Clinic-Based Population. *PloS one* 2014; **9**:e94062–8.
- 25 Duong YT, Mavengere Y, Patel H, Moore C, Manjengwa J, Sibandze D, *et al.* Poor Performance of the Determine HIV-1/2 Ag/Ab Combo Fourth-Generation Rapid Test for Detection of Acute Infections in a National Household Survey in Swaziland. *Journal of Clinical Microbiology* 2014; **52**:3743–3748.
- 26 Jones CB, Kuldane K, Muir D, Phekoo K, Black A, Sacks R, *et al.* Clinical evaluation of the Determine HIV-1/2 Ag/Ab Combo test. *J INFECT DIS* 2012; **206**:1947–9– author reply 1949–50.
- 27 Kilembe W, Keeling M, Karita E, Lakhi S, Chetty P, Price MA, *et al.* Failure of A Novel, Rapid Antigen and Antibody Combination Test to Detect Antigen-Positive HIV Infection in African Adults with Early HIV Infection. *PloS one* 2012; **7**:e37154–6.
- 28 Rosenberg NE, Kamanga G, Phiri S, Nsona D, Pettifor A, Rutstein SE, *et al.* Detection of Acute HIV Infection: A Field Evaluation of the Determine® HIV-1/2 Ag/Ab Combo Test. *J INFECT DIS* 2011; **205**:528–534.

- 29 Faraoni S, Rocchetti A, Gotta F, Ruggiero T, Orofino G, Bonora S, *et al.* Evaluation of a rapid antigen and antibody combination test in acute HIV infection. *Journal of Clinical Virology* 2013; **57**:84–87.
- 30 Chetty V, Moodley D, Chuturgoon A. Evaluation of a 4th generation rapid HIV test for earlier and reliable detection of HIV infection in pregnancy. *Journal of Clinical Virology* 2012; **54**:180–184.
- 31 Beelaert G, Fransen K. Evaluation of a rapid and simple fourth-generation HIV screening assay for qualitative detection of HIV p24 antigen and/or antibodies to HIV-1 and HIV-2. *Journal of virological methods* 2010; **168**:218–222.
- 32 Taegtmeyer M, MacPherson P, Jones K, Hopkins M, Moorcroft J, Lalloo DG, *et al.* Programmatic Evaluation of a Combined Antigen and Antibody Test for Rapid HIV Diagnosis in a Community and Sexual Health Clinic Screening Programme. *PloS one* 2011; **6**:e28019–5.
- 33 Brauer M, De Villiers JC, Mayaphi SH. Evaluation of the Determine™ fourth generation HIV rapid assay. *Journal of virological methods* 2013; **189**:180–183.
- 34 Fox J, Dunn H, O'Shea S. Low rates of p24 antigen detection using a fourth-generation point of care HIV test. *Sexually Transmitted Infections* 2011; **87**:178–179.
- 35 Patel P, Bennett B, Sullivan T, Parker MM, Heffelfinger JD, Sullivan PS, *et al.* Rapid HIV screening: missed opportunities for HIV diagnosis and prevention. *J Clin Virol* 2012; **54**:42–47.
- 36 Smallwood M, Vijh R, Nauche B, Lebouché B, Joseph L, Pai NP. Evaluation of a rapid point of care test for detecting acute and established HIV infection, and examining the role of study quality on diagnostic accuracy: A Bayesian meta-analysis. *PloS one* 2016; **11**:e0149592.
- 37 Chandwani S, Moore T, Kaul A, Krasinski K, Borkowsky W. Early diagnosis of human immunodeficiency virus type 1-infected infants by plasma p24 antigen assay after immune complex dissociation. *Pediatr Infect Dis J* 1993; **12**:96–97.
- 38 Quinn TC, Kline R, Moss MW, Livingston RA, Hutton N. Acid dissociation of immune complexes improves diagnostic utility of p24 antigen detection in perinatally acquired human immunodeficiency virus infection. *J INFECT DIS* 1993; **167**:1193–1196.
- 39 Bredberg-Rådén U, Urassa E, Grankvist O, Massawe A, Lyamuya E, Kawo G, *et al.* Early diagnosis of HIV-1 infection in infants in Dar es Salaam, Tanzania. *Clin Diagn Virol* 1995; **4**:163–173.
- 40 Bulterys M, Farzadegan H, Chao A, Dushimimana A, Voltz A, Nawrocki P, *et al.* Diagnostic utility of immune-complex-dissociated p24 antigen detection in perinatally acquired HIV-1 infection in Rwanda. *J Acquir Immune Defic Syndr Hum Retrovirol* 1995; **10**:186–191.
- 41 Lewis DE, Adu-Oppong A, Hollinger FB, Rosenblatt HM, Hanson IC, Reuben JM, *et al.* Sensitivity of immune complex-dissociated p24 antigen testing for early detection of human immunodeficiency virus in infants. *Clin Diagn Lab Immunol* 1995; **2**:87–90.
- 42 Nielsen K, Santos E, Rubini N, Sales W, Sion F, Sá CA, *et al.* Immune complex-dissociated p24 antigenemia in the diagnosis of human immunodeficiency virus infection in vertically infected Brazilian children. *Pediatr Infect Dis J* 1995; **14**:67–69.
- 43 Lyamuya E, Bredberg-Rådén U, Massawe A, Urassa E, Kawo G, Msemu G, *et al.* Performance of a modified HIV-1 p24 antigen assay for early diagnosis of HIV-1 infection in infants and prediction of mother-to-infant transmission of HIV-1 in Dar es Salaam, Tanzania. *J Acquir Immune Defic Syndr Hum Retrovirol* 1996; **12**:421–426.



- 44 Nesheim S, Lee F, Kalish ML, Ou CY, Sawyer M, Clark S, *et al.* Diagnosis of perinatal human immunodeficiency virus infection by polymerase chain reaction and p24 antigen detection after immune complex dissociation in an urban community hospital. *J INFECT DIS* 1997; **175**:1333–1336.
- 45 Panakitsuwan S, Yoshihara N, Hashimoto N, Miyamura K, Chotpitayasunondh T. Early diagnosis of vertical HIV infection in infants by rapid detection of immune complex-dissociated HIV p24 antigen. *AIDS Patient Care STDS* 1997; **11**:429–433.
- 46 Paul MO, Toedter G, Hofheinz D, Tetali S, Pelton S, Marecki M, *et al.* Diagnosis of human immunodeficiency virus type 1 infection in infants by immune complex dissociation p24 assay. *Clin Diagn Lab Immunol* 1997; **4**:75–78.
- 47 Rich KC, Janda W, Kalish LA, Lew J, Hofheinz D, Landesman S, *et al.* Immune complex-dissociated p24 antigen in congenital or perinatal HIV infection: role in the diagnosis and assessment of risk of infection in infants. *J Acquir Immune Defic Syndr Hum Retrovirol* 1997; **15**:198–203.
- 48 Daar ES, Little S, Pitt J, Santangelo J, Ho P, Harawa N, *et al.* Diagnosis of primary HIV-1 infection. Los Angeles County Primary HIV Infection Recruitment Network. *Ann Intern Med* 2001; **134**:25–29.
- 49 Hecht FM, Busch MP, Rawal B, Webb M, Rosenberg E, Swanson M, *et al.* Use of laboratory tests and clinical symptoms for identification of primary HIV infection. *AIDS* 2002; **16**:1119–1129.
- 50 Sutthent R, Gaudart N, Chokpaibulkit K, Tanliang N, Kanoksinsombath C, Chaisilwatana P. p24 Antigen Detection Assay Modified with a Booster Step for Diagnosis and Monitoring of Human Immunodeficiency Virus Type 1 Infection. *Journal of Clinical Microbiology* 2003; **41**:1016–1022.
- 51 Sherman GG, Stevens G, Stevens WS. Affordable diagnosis of human immunodeficiency virus infection in infants by p24 antigen detection. *Pediatr Infect Dis J* 2004; **23**:173–176.
- 52 Respass RA, Cachafeiro A, Withum D, Fiscus SA, Newman D, Branson B, *et al.* Evaluation of an Ultrasensitive p24 Antigen Assay as a Potential Alternative to Human Immunodeficiency Virus Type 1 RNA Viral Load Assay in Resource-Limited Settings. *Journal of Clinical Microbiology* 2005; **43**:506–508.
- 53 Nouhin J, Nguyen M. Evaluation of a boosted-p24 antigen assay for the early diagnosis of pediatric HIV-1 infection in Cambodia. *Am J Trop Med Hyg* 2006; **75**:1103–1105.
- 54 Patton JC, Sherman GG, Coovadia AH, Stevens WS, Meyers TM. Ultrasensitive Human Immunodeficiency Virus Type 1 p24 Antigen Assay Modified for Use on Dried Whole-Blood Spots as a Reliable, Affordable Test for Infant Diagnosis. *Clinical and Vaccine Immunology* 2006; **13**:152–155.
- 55 Fiscus SA, Wiener J, Abrams EJ, Bulterys M, Cachafeiro A, Respass RA. Ultrasensitive p24 Antigen Assay for Diagnosis of Perinatal Human Immunodeficiency Virus Type 1 Infection. *Journal of Clinical Microbiology* 2007; **45**:2274–2277.
- 56 Ly TD, Ebel A, Faucher V, Fihman V, Laperche S. Could the new HIV combined p24 antigen and antibody assays replace p24 antigen specific assays? *Journal of virological methods* 2007; **143**:86–94.
- 57 Patton JC, Coovadia AH, Meyers TM, Sherman GG. Evaluation of the ultrasensitive human immunodeficiency virus type 1 (HIV-1) p24 antigen assay performed on dried blood spots for diagnosis of HIV-1 infection in infants. *Clin Vaccine Immunol* 2008; **15**:388–391.

- 58 Cachafeiro A, Sherman GG, Sohn AH, Beck-Sague C, Fiscus SA. Diagnosis of human immunodeficiency virus type 1 infection in infants by use of dried blood spots and an ultrasensitive p24 antigen assay. *Journal of Clinical Microbiology* 2009; **47**:459–462.
- 59 Mwapasa V, Cachafeiro A, Makuta Y, Beckstead DJ, Pennell ML, Chilima B, *et al.* Using a simplified human immunodeficiency virus type 1 p24 antigen assay to diagnose pediatric HIV-infection in Malawi. *J Clin Virol* 2010; **49**:299–302.
- 60 Stewart P, Cachafeiro A, Napravnik S, Eron JJ, Frank I, van der Horst C, *et al.* Performance characteristics of the CaviDi ExaVir viral load assay and the ultra-sensitive P24 assay relative to the Roche Monitor HIV-1 RNA assay. *Journal of Clinical Virology* 2010; **49**:198–204.
- 61 Bhowan K, Kalk E, Khan S, Sherman G. Identifying HIV infection in South African women: How does a fourth generation HIV rapid test perform? *Afr J Lab Med* 2011; **1**:83–5.
- 62 Kivuyo SL, Johannessen A, Trøseid M, Kasubi MJ, Gundersen SG, Naman E, *et al.* p24 antigen detection on dried blood spots is a feasible and reliable test for infant HIV infection in rural Tanzania. *Int J STD AIDS* 2011; **22**:719–721.
- 63 Spacek LA, Lutwama F, Shihab HM, Summerton J, Kanya MR, Ronald A, *et al.* Diagnostic accuracy of ultrasensitive heat-denatured HIV-1 p24 antigen in non-B subtypes in Kampala, Uganda. *Int J STD AIDS* 2011; **22**:310–314.
- 64 Bystryak S, Acharya C. Detection of HIV-1 p24 antigen in patients with varying degrees of viremia using an ELISA with a photochemical signal amplification system. *Clinica Chimica Acta* 2016; **456**:128–136.
- 65 Kong W, Li Y, Cheng S, Yan C, An S, Dong Z, *et al.* Luminex xMAP combined with Western blot improves HIV diagnostic sensitivity. *Journal of virological methods* 2016; **227**:1–5.
- 66 Stekler JD, Ure G, O'Neal JD, Lane A, Swanson F, Maenza J, *et al.* Performance of Determine Combo and other point-of-care HIV tests among Seattle MSM. *J Clin Virol* 2016; **76**:8–13.
- 67 Blaich A, Buser A, Stöckle M, Gehringer C, Hirsch HH, Battegay M, *et al.* Specificity of two HIV screening tests detecting simultaneously HIV-1 p24 antigen and antibodies to HIV-1 and –2. *Journal of virological methods* 2017; **249**:143–146.
- 68 Fitzgerald N, Cross M, O'Shea S, Fox J. Diagnosing acute HIV infection at point of care: a retrospective analysis of the sensitivity and specificity of a fourth-generation point-of-care test for detection of HIV core protein p24. *Sexually Transmitted Infections* 2017; **93**:100–101.
- 69 Ghisetti V, Coignard C, Alice T, Thoai Duong L. Evaluation of the performance of a new automated HIV combination assay. *J Clin Virol* 2017; **96**:80–83.
- 70 Masciotra S, Luo W, Westheimer E, Cohen SE, Gay CL, Hall L, *et al.* Performance evaluation of the FDA-approved Determine™ HIV-1/2 Ag/Ab Combo assay using plasma and whole blood specimens. *J Clin Virol* 2017; **91**:95–100.
- 71 Meggi B, Bollinger T, Mabunda N, Vubil A, Tobaiwa O, Quevedo JI, *et al.* Point-Of-Care p24 Infant Testing for HIV May Increase Patient Identification despite Low Sensitivity. *PLoS one* 2017; **12**:e0169497.
- 72 Stafylis C, Klausner JD. Evaluation of two 4th generation point-of-care assays for the detection of Human Immunodeficiency Virus infection. *PLoS one* 2017; **12**:e0183944.
- 73 van Tienen C, Rugebregt S, Scherbeijn S, Götz H, GeurtsvanKessel C. The performance of the Alere HIV combo point-of-care test on stored serum samples; useful for detection of early HIV-1 infections? *Sexually Transmitted Infections* 2017; :sextrans–2016–052818–4.

- 74 Fransen K, de Baetselier I, Rammutla E, Ahmed K, Owino F, Agingu W, *et al.* Performance of serological and molecular tests within acute HIV infection. *Journal of Clinical Virology* 2017; **93**:81–84.
- 75 Eshleman SH, Piwowar-Manning E, Sivay MV, Debevec B, Veater S, McKinstry L, *et al.* Performance of the BioPlex 2200 HIV Ag-Ab assay for identifying acute HIV infection. *Journal of Clinical Virology* 2018; **99-100**:67–70.
- 76 Zhao Y, Gou Y, Li D, Wang T, Huang X, Shi M, *et al.* Performance evaluation of a new automated fourth-generation HIV Ag/Ab combination chemiluminescence immunoassay. *Clin Chem Lab Med* 2018; **56**:e115–e117.
- 77 Kageyama S, Yamada O, Mohammad SS, Hama S, Hattori N, Asanaka M, *et al.* An improved method for the detection of HIV antigen in the blood of carriers. *Journal of virological methods* 1988; **22**:125–131.
- 78 Mathiesen T, Sundqvist VA, Albert J, Ohlsson E, Wahren B. Acid hydrolysis of serum samples to increase detection of HIV antigen. *Journal of virological methods* 1988; **22**:143–148.
- 79 Sydow von M, Gaines H, Sönnernborg A, Forsgren M, Pehrson PO, Strannegård O. Antigen detection in primary HIV infection. *Br Med J (Clin Res Ed)* 1988; **296**:238–240.
- 80 Nishanian P, Huskins KR, Stehn S, Detels R, Fahey JL. A simple method for improved assay demonstrates that HIV p24 antigen is present as immune complexes in most sera from HIV-infected individuals. *J INFECT DIS* 1990; **162**:21–28.
- 81 Ascher DP, Roberts C, Fowler A. Acidification modified p24 antigen capture assay in HIV seropositives. *J Acquir Immune Defic Syndr* 1992; **5**:1080–1083.
- 82 Bollinger RC, Kline RL, Francis HL, Moss MW, Bartlett JG, Quinn TC. Acid dissociation increases the sensitivity of p24 antigen detection for the evaluation of antiviral therapy and disease progression in asymptomatic human immunodeficiency virus-infected persons. *J INFECT DIS* 1992; **165**:913–916.
- 83 Papaevangelou V, Moore T, Nagaraj V, Krasinski K, Borkowsky W. Lack of predictive value of maternal human immunodeficiency virus p24 antigen for transmission of infection to their children. *Pediatr Infect Dis J* 1992; **11**:851–855.
- 84 Fenouillet E, Blanes N, Coutellier A, Gluckman JC. Relationship between anti-p24 antibody levels and p24 antigenemia in HIV-infected patients. *AIDS Research and Human Retroviruses* 1993; **9**:1251–1255.
- 85 Kashala O, Kayembe K, Kanki P, Mukeba P, Diese M, Kalengayi M, *et al.* Humoral aspects of anti-HIV immune responses in Zairians with AIDS: lower antigenemia does not correlate with immune complex levels. *AIDS Research and Human Retroviruses* 1993; **9**:251–258.
- 86 Lillo FB, Cao Y, Concedi DR, Varnier OE. Improved detection of serum HIV p24 antigen after acid dissociation of immune complexes. *AIDS* 1993; **7**:1331–1336.
- 87 Miles SA, Balden E, Magpantay L, Wei L, Leiblein A, Hofheinz D, *et al.* Rapid serologic testing with immune-complex-dissociated HIV p24 antigen for early detection of HIV infection in neonates. Southern California Pediatric AIDS Consortium. *The New England journal of medicine* 1993; **328**:297–302.
- 88 Pokriefka RA, Manzor O, Markowitz NP, Saravolatz LD, Kvale P, Donovan RM. Increased detection of human immunodeficiency virus antigenemia after dissociation of immune complexes at low pH. *Journal of Clinical Microbiology* 1993; **31**:1656–1658.

- 89 Schüpbach J, Böni J. Quantitative and sensitive detection of immune-complexed and free HIV antigen after boiling of serum. *Journal of virological methods* 1993; **43**:247–256.
- 90 Simon F, Rahimy C, Krivine A, Levine M, Pepin JM, Lapierre D, *et al.* Antibody avidity measurement and immune complex dissociation for serological diagnosis of vertically acquired HIV-1 infection. *J Acquir Immune Defic Syndr* 1993; **6**:201–207.
- 91 Vasudevachari MB, Salzman NP, Woll DR, Mast C, Uffelman KW, Toedter G, *et al.* Clinical utility of an enhanced human immunodeficiency virus type 1 p24 antigen capture assay. *Journal of Clinical Immunology* 1993; **13**:185–192.
- 92 Duiculescu DC, Geffin RB, Scott GB, Scott WA. Clinical and immunological correlates of immune-complex-dissociated HIV-1 p24 antigen in HIV-1-infected children. *J Acquir Immune Defic Syndr* 1994; **7**:807–815.
- 93 Morand-Joubert L, Costagliola D, Bludau H, Petit JC, Lefrère JJ. Predicting progression of HIV disease: usefulness of acid-dissociated p24 antigen. *J Acquir Immune Defic Syndr* 1994; **7**:676–680.
- 94 Schüpbach J, Böni J, Tomasik Z, Jendis J, Seger R, Kind C. Sensitive detection and early prognostic significance of p24 antigen in heat-denatured plasma of human immunodeficiency virus type 1-infected infants. Swiss Neonatal HIV Study Group. *J INFECT DIS* 1994; **170**:318–324.
- 95 Brown AE, Lane JR, Wagner KF, Zhou S, Chung R, Ray KL, *et al.* Rates of p24 antigenemia and viral isolation in comparable white and black HIV-infected subjects. Military Medical Consortium for Applied Retroviral Research. *AIDS* 1995; **9**:325–328.
- 96 Gutiérrez M, Vallejo A, Soriano V. Enhancement of HIV antigen detection after acid dissociation of immune complexes is associated with loss of specificity. *Vox Sang* 1995; **68**:132–133.
- 97 Kappes JC, Saag MS, Shaw GM, Hahn BH, Chopra P, Chen S, *et al.* Assessment of antiretroviral therapy by plasma viral load testing: standard and ICD HIV-1 p24 antigen and viral RNA (QC-PCR) assays compared. *J Acquir Immune Defic Syndr Hum Retrovirol* 1995; **10**:139–149.
- 98 Hammer S, Crumpacker C, D'Aquila R, Jackson B, Lathey J, Livnat D, *et al.* Use of virologic assays for detection of human immunodeficiency virus in clinical trials: recommendations of the AIDS Clinical Trials Group Virology Committee. *Journal of Clinical Microbiology*. 1993; **31**:2557–2564.
- 99 Guay LA, Hom DL, Mmiro F, Piwowar EM, Kabengeru S, Parsons J, *et al.* Detection of human immunodeficiency virus type 1 (HIV-1) DNA and p24 antigen in breast milk of HIV-1-infected Ugandan women and vertical transmission. *PEDIATRICS* 1996; **98**:438–444.
- 100 Stanojevic M, Zerjav S, Jevtovic D, Markovic L. Antigen/antibody content of circulating immune complexes in HIV-infected patients. *Biomed Pharmacother* 1996; **50**:488–493.
- 101 Böni J, Opravil M, Tomasik Z, Rothen M, Bisset L, Grob PJ, *et al.* Simple monitoring of antiretroviral therapy with a signal-amplification-boosted HIV-1 p24 antigen assay with heat-denatured plasma. *AIDS* 1997; **11**:F47–52.
- 102 Fackler OT, Schäfer M, Schmidt W, Zippel T, Heise W, Schneider T, *et al.* HIV-1 p24 but not proviral load is increased in the intestinal mucosa compared with the peripheral blood in HIV-infected patients. *AIDS* 1998; **12**:139–146.
- 103 Steindl F, Armbruster C, Pierer K, Purtscher M, Katinger HW. A simple and robust method for the complete dissociation of HIV-1 p24 and other antigens from immune complexes in serum and plasma samples. *Journal of Immunological Methods* 1998; **217**:143–151.

- 104 Nadal D, Böni J, Kind C, Varnier OE, Steiner F, Tomasik Z, *et al.* Prospective evaluation of amplification-boosted ELISA for heat-denatured p24 antigen for diagnosis and monitoring of pediatric human immunodeficiency virus type 1 infection. *J INFECT DIS* 1999; **180**:1089–1095.
- 105 Ortigão-de-Sampaio MB, Abreu TF, Linhares-de-Carvalho MI, Ponce de Leon A, Castello-Branco LR. Surrogate markers of disease progression in HIV-infected children in Rio de Janeiro, Brazil. *Journal of Tropical Pediatrics* 1999; **45**:299–302.
- 106 Ledergerber B, Flepp M, Böni J, Tomasik Z, Cone RW, Lüthy R, *et al.* Human immunodeficiency virus type 1 p24 concentration measured by boosted ELISA of heat-denatured plasma correlates with decline in CD4 cells, progression to AIDS, and survival: comparison with viral RNA measurement. *J INFECT DIS* 2000; **181**:1280–1288.
- 107 Read JS, Rich KC, Korelitz JJ, Mofenson LM, Harris R, Moye JH, *et al.* Quantification of human immunodeficiency virus type 1 p24 antigen and antibody rivals human immunodeficiency virus type 1 RNA and CD4+ enumeration for prognosis. National Institute of Child Health and Human Development Intravenous Immunoglobulin Clinical Trial Study Group. *Pediatr Infect Dis J* 2000; **19**:544–551.
- 108 Prado JG, Shintani A, Bofill M, Clotet B, Ruiz L, Martinez-Picado J. Lack of Longitudinal Inpatient Correlation between p24 Antigenemia and Levels of Human Immunodeficiency Virus (HIV) Type 1 RNA in Patients with Chronic HIV Infection during Structured Treatment Interruptions. *Journal of Clinical Microbiology* 2004; **42**:1620–1625.
- 109 Parpia ZA, Elghanian R, Nabatiyan A, Hardie DR, Kelso DM. p24 antigen rapid test for diagnosis of acute pediatric HIV infection. *J Acquir Immune Defic Syndr* 2010; **55**:413–419.
- 110 Hashida S, Hashinaka K, Nishikata I, Oka S, Shimada K, Saitoh A, *et al.* Measurement of human immunodeficiency virus type 1 p24 in serum by an ultrasensitive enzyme immunoassay, the two-site immune complex transfer enzyme immunoassay. *Journal of Clinical Microbiology* 1995; **33**:298–303.
- 111 Ishikawa S, Hashida S, Hashinaka K, Saito A, Takamizawa A, Shinagawa H, *et al.* Ultrasensitive immune complex transfer enzyme immunoassay of HIV-1 p24 antigen with less serum interference using 2,4-dinitrophenyl-anti-HIV-1 p24 IgG and indirectly immobilized (anti-2,4-dinitrophenyl group) Fab.. *J Clin Lab Anal* 1999; **13**:126–132.
- 112 Ishikawa S, Hashida S, Hashinaka K, Ishikawa E. Rapid and ultrasensitive enzyme immunoassay (thin aqueous layer immune complex transfer enzyme immunoassay) for HIV-1 p24 antigen. *J Clin Lab Anal* 1998; **12**:205–212.
- 113 Barletta JM, Edelman DC, Constantine NT. Lowering the Detection Limits of HIV-1 Viral Load Using Real-Time Immuno-PCR for HIV-1 p24 Antigen. *Am J Clin Pathol* 2004; **122**:20–27.
- 114 Barletta J, Bartolome A, Constantine NT. Immunomagnetic quantitative immuno-PCR for detection of less than one HIV-1 virion. *Journal of virological methods* 2009; **157**:122–132.
- 115 Alphonse Tshishi T, Ditu SM, Kabwe BM, Kiampa Philomène M, Bamoleke Anaclet S. A sensitive radioimmunoassay of human immunodeficiency virus type-1 p24 antigen in serum. *Immuno-analyse & Biologie Spécialisée* 2007; **22**:190–193.
- 116 Workman S, Wells SK, Pau C-P, Owen SM, Dong XF, LaBorde R, *et al.* Rapid detection of HIV-1 p24 antigen using magnetic immuno-chromatography (MICT). *Journal of virological methods* 2009; **160**:14–21.
- 117 Nabatiyan A, Baumann MA, Parpia Z, Kelso D. A lateral flow-based ultra-sensitive p24 HIV assay utilizing fluorescent microparticles. *J Acquir Immune Defic Syndr* 2010; **53**:55–61.

- 118 Tang S, Hewlett I. Nanoparticle-Based Immunoassays for Sensitive and Early Detection of HIV-1 Capsid (p24) Antigen. *J INFECT DIS* 2010; **201**:S59–S64.
- 119 Dong H, Liu J, Zhu H, Ou C-Y, Xing W, Qiu M, *et al.* Two types of nanoparticle-based bio-barcode amplification assays to detect HIV-1 p24 antigen. *Virology Journal* 2012; **9**:180.
- 120 Liu J, Du B, Zhang P, Haleyurgirisetty M, Zhao J, Ragupathy V, *et al.* Development of a microchip Europium nanoparticle immunoassay for sensitive point-of-care HIV detection. *Biosensors and Bioelectronics* 2014; **61**:177–183.
- 121 Haleyur Giri Setty MK, Liu J, Mahtani P, Zhang P, Du B, Ragupathy V, *et al.* Novel Time-Resolved Fluorescence Europium Nanoparticle Immunoassay for Detection of Human Immunodeficiency Virus-1 Group O Viruses Using Microplate and Microchip Platforms. *AIDS Research and Human Retroviruses* 2016; **32**:612–619.
- 122 Gan N, Hou J, Hu F, Zheng L, Ni M, Cao Y. An Amperometric Immunosensor Based on a Polyelectrolyte/ Gold Magnetic Nanoparticle Supramolecular Assembly—Modified Electrode for the Determination of HIV p24 in Serum. *Molecules* 2010; **15**:5053–5065.
- 123 Gan N, Du X, Cao Y, Hu F, Li T, Jiang Q. An Ultrasensitive Electrochemical Immunosensor for HIV p24 Based on Fe<sub>3</sub>O<sub>4</sub>@SiO<sub>2</sub> Nanomagnetic Probes and Nanogold Colloid-Labeled Enzyme–Antibody Copolymer as Signal Tag. *Materials* 2013; **6**:1255–1269.
- 124 Zheng L, Jia L, Li B, Situ B, Liu Q, Wang Q, *et al.* A Sandwich HIV p24 Amperometric Immunosensor Based on a Direct Gold Electroplating-Modified Electrode. *Molecules* 2012; **17**:5988–6000.
- 125 Teeeparuksapun K, Hedström M, Wong EY, Tang S, Hewlett IK, Mattiasson B. Ultrasensitive Detection of HIV-1 p24 Antigen Using Nanofunctionalized Surfaces in a Capacitive Immunosensor. *Anal Chem* 2010; **82**:8406–8411.
- 126 Erlandsson D, Teeeparuksapun K, Mattiasson B, Hedström M. Automated flow-injection immunosensor based on current pulse capacitive measurements. *Sensors & Actuators: B Chemical* 2014; **190**:295–304.
- 127 Kheiri F, Sabzi RE, Jannatdoust E, Shojaeefar E, Sedghi H. A novel amperometric immunosensor based on acetone-extracted propolis for the detection of the HIV-1 p24 antigen. *Biosensors and Bioelectronics* 2011; **26**:4457–4463.
- 128 He J, Evers DL, O'Leary TJ, Mason JT. Immunoliposome-PCR: a generic ultrasensitive quantitative antigen detection system. *J Nanobiotechnol* 2012; **10**:26.
- 129 la Rica de R, Stevens MM. Plasmonic ELISA for the ultrasensitive detection of disease biomarkers with the naked eye. *Nature Nanotech* 2012; **7**:821–824.
- 130 la Rica de R, Stevens MM. Plasmonic ELISA for the detection of analytes at ultralow concentrations with the naked eye. *Nature Protocols* 2013; **8**:1759–1764.
- 131 Chang L, Song L, Fournier DR, Kan CW, Patel PP, Ferrell EP, *et al.* Simple diffusion-constrained immunoassay for p24 protein with the sensitivity of nucleic acid amplification for detecting acute HIV infection. *Journal of virological methods* 2013; **188**:153–160.
- 132 Cabrera C, Chang L, Stone M, Busch M, Wilson DH. Rapid, Fully Automated Digital Immunoassay for p24 Protein with the Sensitivity of Nucleic Acid Amplification for Detecting Acute HIV Infection. *Clinical Chemistry* 2015; **61**:1372–1380.

- 133 Passaes CPB, Bruel T, Decalf J, David A, Angin M, Monceaux V, *et al.* Ultrasensitive HIV-1 p24 Assay Detects Single Infected Cells and Differences in Reservoir Induction by Latency Reversal Agents. *Journal of Virology* 2017; **91**:e02296–16.
- 134 Zhou L, Huang J, Yu B, Liu Y, You T. A Novel Electrochemiluminescence Immunosensor for the Analysis of HIV-1 p24 Antigen Based on P-RGO@Au@Ru-SiO<sub>2</sub> Composite. *ACS Appl Mater Interfaces* 2015; **7**:24438–24445.
- 135 Cretich M, Bagnati M, Damin F, Sola L, Chiari M. Overcoming mass transport limitations to achieve femtomolar detection limits on silicon protein microarrays. *Analytical Biochemistry* 2011; **418**:164–166.
- 136 Cretich M, Torrisi M, Daminelli S, Gagni P, Plavisch L, Chiari M. Flow-through, viral co-infection assay for resource-limited settings. *Talanta* 2015; **132**:315–320.
- 137 Aroonyadet N, Wang X, Song Y, Chen H, Cote RJ, Thompson ME, *et al.* Highly Scalable, Uniform, and Sensitive Biosensors Based on Top-Down Indium Oxide Nanoribbons and Electronic Enzyme-Linked Immunosorbent Assay. *Nano Lett* 2015; **15**:1943–1951.
- 138 Nakatsuma A, Kaneda M, Kodama H, Morikawa M, Watabe S, Nakaishi K, *et al.* Detection of HIV-1 p24 at Attomole Level by Ultrasensitive ELISA with Thio-NAD Cycling. *PLoS one* 2015; **10**:e0131319–9.
- 139 Bystryak S, Santockyte R. Increased Sensitivity of HIV-1 p24 ELISA Using a Photochemical Signal Amplification System. *J Acquir Immune Defic Syndr* 2015; **70**:109–114.
- 140 Chunduri LAA, Haleyurgirisetty MK, Patnaik S, Bulagonda PE, Kurdekar A, Liu J, *et al.* Development of carbon dot based microplate and microfluidic chip immunoassay for rapid and sensitive detection of HIV-1 p24 antigen. *Microfluid Nanofluid* 2016; **20**:167.
- 141 Kurdekar A, Chunduri LAA, Bulagonda EP, Haleyurgirisetty MK, Kamisetti V, Hewlett IK. Comparative performance evaluation of carbon dot-based paper immunoassay on Whatman filter paper and nitrocellulose paper in the detection of HIV infection. *Microfluid Nanofluid* 2016; **20**:99.
- 142 Li X, Liu X. A Microfluidic Paper-Based Origami Nanobiosensor for Label-Free, Ultrasensitive Immunoassays. *Advanced Healthcare Materials* 2016; **5**:1326–1335.
- 143 Ma Y, Ni C, Dzakah EE, Wang H, Kang K, Tang S, *et al.* Development of Monoclonal Antibodies against HIV-1 p24 Protein and Its Application in Colloidal Gold Immunochromatographic Assay for HIV-1 Detection. *BioMed Research International* 2016; **2016**:1–6.
- 144 Merbah M, Onkar S, Grivel J-C, Vanpouille C, Biancotto A, Bonar L, *et al.* Standardization of a cytometric p24-capture bead-assay for the detection of main HIV-1 subtypes. *Journal of virological methods* 2016; **230**:45–52.
- 145 Vallooran JJ, Handschin S, Pillai SM, Vetter BN, Rusch S, Beck HP, *et al.* Lipidic Cubic Phases as a Versatile Platform for the Rapid Detection of Biomarkers, Viruses, Bacteria, and Parasites. *Advanced Functional Materials* 2016; **26**:181–190.
- 146 Zhang Y, Yang H, Yu J, Wei H. Rapid and sensitive detection of HIV-1 p24 antigen by immunomagnetic separation coupled with catalytic fluorescent immunoassay. *Anal Bioanal Chem* 2016; **408**:6115–6121.
- 147 Kosaka PM, Pini V, Calleja M, Tamayo J. Ultrasensitive detection of HIV-1 p24 antigen by a hybrid nanomechanical-optoplasmonic platform with potential for detecting HIV-1 at first week after infection. *PLoS one* 2017; **12**:e0171899.

- 148 Loynachan CN, Thomas MR, Gray ER, Richards DA, Kim J, Miller BS, *et al.* Platinum Nanocatalyst Amplification: Redefining the Gold Standard for Lateral Flow Immunoassays with Ultrabroad Dynamic Range. *ACS Nano* 2018; **12**:279–288.
- 149 Ma Y, Shen X-L, Zeng Q, Wang H-S, Wang L-S. A multi-walled carbon nanotubes based molecularly imprinted polymers electrochemical sensor for the sensitive determination of HIV-p24. *Talanta* 2017; **164**:121–127.
- 150 Ran B, Xianyu Y, Dong M, Chen Y, Qian Z, Jiang X. Bioorthogonal Reaction-Mediated ELISA Using Peroxide Test Strip as Signal Readout for Point-of-Care Testing. *Anal Chem* 2017; **89**:6113–6119.
- 151 Ruiz-Sanchez AJ, Parolo C, Miller BS, Gray ER, Schlegel K, McKendry RA. Tuneable plasmonic gold dendrimer nanochains for sensitive disease detection. *Journal of Materials Chemistry B* 2017; :1–5.
- 152 Turbé V, Gray ER, Lawson VE, Nastouli E, Brookes JC, Weiss RA, *et al.* Towards an ultra-rapid smartphone- connected test for infectious diseases. *Sci Rep* 2017; **7**:11971.
- 153 Pascual A, Cachafeiro A, Funk ML, Fiscus SA. Comparison of an Assay Using Signal Amplification of the Heat-Dissociated p24 Antigen with the Roche Monitor Human Immunodeficiency Virus RNA Assay. *Journal of Clinical Microbiology* 2002; **40**:2472–2475.
- 154 Fiebig EW, Wright DJ, Rawal BD, Garrett PE, Schumacher RT, Peddada L, *et al.* Dynamics of HIV viremia and antibody seroconversion in plasma donors: implications for diagnosis and staging of primary HIV infection. *AIDS* 2003; **17**:1871–1879.
- 155 Ribas SG, Ondoa P, Schüpbach J, van der Groen G, Fransen K. Performance of a quantitative human immunodeficiency virus type 1 p24 antigen assay on various HIV-1 subtypes for the follow-up of human immunodeficiency type 1 seropositive individuals. *Journal of virological methods* 2003; **113**:29–34.
- 156 Stevens G, Rekhviashvili N, Scott LE, Gonin R, Stevens W. Evaluation of Two Commercially Available, Inexpensive Alternative Assays Used for Assessing Viral Load in a Cohort of Human Immunodeficiency Virus Type 1 Subtype C-Infected Patients from South Africa. *Journal of Clinical Microbiology* 2005; **43**:857–861.
- 157 Brinkhof MWG, Böni J, Steiner F, Tomasik Z, Nadal D, Schüpbach J. Evaluation of p24-based antiretroviral treatment monitoring in pediatric HIV-1 infection: prediction of the CD4+ T-cell changes between consecutive visits. *J Acquir Immune Defic Syndr* 2006; **41**:557–562.
- 158 Erikstrup C, Kallestrup P, Zinyama-Gutsire RBL, Gomo E, Lüneborg-Nielsen M, Gerstoff J, *et al.* p24 as a predictor of mortality in a cohort of HIV-1-infected adults in rural Africa. *J Acquir Immune Defic Syndr* 2008; **48**:345–349.
- 159 Coombs RW, Collier AC, Allain JP, Nikora B, Leuther M, Gjerset GF, *et al.* Plasma viremia in human immunodeficiency virus infection. *The New England journal of medicine* 1989; **321**:1626–1631.
- 160 Brown AE, Vahey MT, Zhou SY, Chung RC, Ruiz NM, Hofheinz D, *et al.* Quantitative relationship of circulating p24 antigen with human immunodeficiency virus (HIV) RNA and specific antibody in HIV-infected subjects receiving antiretroviral therapy. The RV43 Study Group. *J INFECT DIS* 1995; **172**:1091–1095.
- 161 Spector SA, Kennedy C, McCutchan JA, Bozzette SA, Straube RG, Connor JD, *et al.* The antiviral effect of zidovudine and ribavirin in clinical trials and the use of p24 antigen levels as a virologic marker. *J INFECT DIS* 1989; **159**:822–828.



- 162 MacDonell KB, Chmiel JS, Poggensee L, Wu S, Phair JP. Predicting progression to AIDS: combined usefulness of CD4 lymphocyte counts and p24 antigenemia. *The American Journal of Medicine* 1990; **89**:706–712.
- 163 Katzenstein DA, Holodniy M, Israelski DM, Sengupta S, Mole LA, Bubp JL, *et al.* Plasma viremia in human immunodeficiency virus infection: relationship to stage of disease and antiviral treatment. *J Acquir Immune Defic Syndr* 1992; **5**:107–112.
- 164 Farzadegan H, Henrard DR, Kleeberger CA, Schragger L, Kirby AJ, Saah AJ, *et al.* Virologic and serologic markers of rapid progression to AIDS after HIV-1 seroconversion. *J Acquir Immune Defic Syndr Hum Retrovirol* 1996; **13**:448–455.
- 165 Sterling TR, Hoover DR, Astemborski J, Vlahov D, Bartlett JG, Schüpbach J. Heat-denatured human immunodeficiency virus type 1 protein 24 antigen: prognostic value in adults with early-stage disease. *J INFECT DIS* 2002; **186**:1181–1185.
- 166 Baillou A, Barin F, Allain JP, Petat E, Kocheleff P, Kadende P, *et al.* Human immunodeficiency virus antigenemia in patients with AIDS and AIDS-related disorders: A comparison between European and Central African populations. *J INFECT DIS* 1987; **156**:830–833.
- 167 Schüpbach J, Günthard H, Joos B, Fischer M, Böni J, Tomasik Z, *et al.* HIV-1 p24 may persist during long-term highly active antiretroviral therapy, increases little during short treatment breaks, and its rebound after treatment stop correlates with CD4(+) T cell loss. *J Acquir Immune Defic Syndr* 2005; **40**:250–256.
